# *Hedychium spicatum*: a systematic review on traditional uses, phytochemistry, pharmacology and future prospectus

Sandeep Rawat<sup>a</sup> , Arun K. Jugran<sup>b</sup>, Indra D. Bhatt<sup>a</sup> and Ranbeer S. Rawal<sup>a</sup>

<sup>a</sup>Center for Biodiversity Conservation and Management, G. B. Pant National Institute of Himalayan Environment and Sustainable Development, Almora and <sup>b</sup>Garhwal Regional Centre, G. B. Pant National Institute of Himalayan Environment and Sustainable Development, Srinagar, India

## Keywords

ethnomedicine; hedychinone; *Hedychium spicatum*; Kapur-kachari; labdane diterpene; medicinal plant; pharmacology; traditional medicine

## Correspondence

Sandeep Rawat, Center for Biodiversity Conservation and Management, G. B. Pant National Institute of Himalayan Environment and Sustainable Development, Kosi-Katarmal, Almora 263 643, Uttarakhand, India.  
E-mail: sandeep\_rawat15@rediffmail.com

Received July 30, 2017

Accepted January 3, 2018

doi: 10.1111/jphp.12890

## Abstract

**Objectives** *Hedychium spicatum* Buch. Ham. ex D.Don. (Family Zingiberaceae) is a rhizomatous herb, used in medicines, food, cosmetics and perfumery industries. Traditionally, it is widely used in treating inflammation, pain, asthma, foul breath, vomiting, diarrhoea, bronchitis, hiccough and blood diseases. This study systematically reviewed traditional and folk uses, pharmacological properties, bioactive compounds and market potential of *H. spicatum*. Research gaps and potential of future research have also been discussed.

**Key findings** Available literature indicates that research on this species is largely focused on phytochemical and pharmacological studies; however, propagation and modern interventions for high productivity have been contravened. These studies demonstrated that the rhizome of the species exhibited many valuable and medicinally important compounds, such as labdane terpenes, hedychinone and polyphenols. Many of the traditional uses of the species have been validated through the findings of pharmacological studies and biological properties of the extracts and pure compounds. Phytochemical constituents and related pharmacological activities have provided some suggestive scientific evidences for the various ethnomedicinal uses of the species in the treatment, control and management of diseases and for new drug discovery.

**Summary** Literature reveals that the species is lacking in exact scientific basis of the beneficial properties. Although, some other distinct biological properties identified in this species also opened new door way for its new applications. Therefore, the mentioned phytochemical constituents such as phenolic and flavonoids compounds; and related pharmacological activities such as antimicrobial, anti-inflammatory and antioxidant activity of the species have provided some suggestive scientific evidences for its potential in pharmaceutical, food and aromatic industries.

## Research Highlights

- Traditional and folk uses of species as well as pharmacological properties, bioactive compounds and propagation of *H. spicatum* is reviewed.
- Different solvent extracts, isolated compounds and essential oils of the rhizome possess number of pharmacological properties such as anti-inflammatory, analgesic, anti-asthmatic, antidiabetic, cytotoxic, antimicrobial and anthelmintic activity.
- Although, some distinct biological properties identified in this species also opened new avenue for its new applications.
- A systematic approach for variety improvement, conservation and sustainable utilisation has been summarised.

## Introduction

Therapeutic potential of medicinal plants has gained wide popularity all across the globe. This popularity can be judged from the fact that over 80% of the populations of developing countries relies on traditional medicine, 85% of the traditional medicine involves the use of plant extract,<sup>[1]</sup> and 70% of modern medicines are derived from medicinal plants.<sup>[2]</sup> Considering the effective use of medicinal plants and their parts singly or in combination with others for treating various human ailments, these medicinal plants have remained subject of enormous curiosity in the pharmaceutical and food industries.<sup>[3]</sup> Among others, family Zingiberaceae consisting of 52 genera and over 1500 species is known for its medicinal, cosmetics, fragrance and food value.<sup>[4]</sup> In India, this family represented by 22 genera and about 170 species.<sup>[4,5]</sup> Of these, major commercially cultivated species include *Zingiber officinale* (ginger), *Curcuma longa* (turmeric), *Amomum subulatum* (large cardamom), *Elettaria cardamomum* (small cardamom) and *Alpinia galanga* (Thai galangal). The genus *Hedychium*, which consists of over 80 species worldwide and reported to be used medicinally for various ailments, is yet to go in commercial cultivation.<sup>[6]</sup> The taxonomy of the genus *Hedychium* has remained controversial since the middle of the nineteenth century, and around 115 names of the genus have been published; however, very few were found to be authenticated and biologically valid.<sup>[7,8]</sup>

*Hedychium spicatum* Buch. Ham. ex D. Don. commonly known as 'spiked ginger lily', 'Van haldi' or 'Kapoorkachari' is considered as one of the important species for its medicinal and food value.<sup>[9,10]</sup> The species is native to south-eastern Asian countries in temperate and subtropical areas found within an altitude of 1000–2800 m asl.<sup>[11]</sup> It is being used in the traditional as well as in modern medicine, cosmetic and perfumery industries.<sup>[9–12]</sup> The overexploitation from wild for essential oil has put the species in the vulnerable<sup>[13]</sup> and rare categories.<sup>[14]</sup>

Over the last 4–5 decades, different research groups have explored this species in various aspects and validated many traditional uses through the use of laboratory animals and a range of *in-vitro* pharmacological approaches. Phytochemical research has expanded the knowledge about the metabolites present in the plant and revealed their potential to interact with biological systems; however, the mechanisms of action as well as the compounds involved in such activities remain mostly unknown or partially known. This review will provide baseline information on the subject, which can be further utilised for the development of better therapeutic agents and health products from *H. spicatum*. Although, review reports are available on the species, but those are largely in the form of compilation of existing

information in specific area of research and are lacking with analysis of the results and trends for future research. It is, therefore, anticipated that the collection of comprehensive and up-to-date information and their critical analysis will be useful in creating new avenues for discovery of novel agents for curing various health ailments. To date, there are four reviews published on the *H. spicatum*. The first review published in 2010 was an overview of traditional uses, essential oil composition and trade value of the species.<sup>[15]</sup> This review listed, around 18 essential oil compounds and few other chemical constituents. The second review published in 2011 was focused on pharmacological activity of the species.<sup>[16]</sup> In this review, a limited number of compounds were listed without any other detailed description. In addition, pharmacognosy work carried out in the species has been covered in this review, and pharmacological properties of the species have been also discussed. The third review published in 2011 highlighted major oil constituents and 4–5 major pharmacological properties.<sup>[17]</sup> In forth review, Badola (2010) summarised ethnopharmacological importance and conservation status of the species.<sup>[14]</sup> As the species has been studied extensively for its phytochemistry and pharmacological activities, there is a need to analysed and discuss the complete scientific data available for this ethnomedicinally important species in the form of a systematic knowledge product. The main objective of this was to discuss in detail ethnomedicinal uses, phytochemistry, and *in-vitro* and *in-vivo* pharmacological activities studied with various extracts, fractions or isolated phytochemicals by different research groups. This paper, thus, systematically analysed available information w.r.t. traditional and folk uses, pharmacological properties, bioactive compounds, propagation and market trade of *H. spicatum*. Based on the in-depth review of each aspect, gap in research has also been highlighted. Also, a systematic approach for variety improvement, conservation and sustainable utilisation of *H. spicatum* has been developed.

## Methodology

Literature survey was conducted for information collection. Scientific search engines, such as Google Scholar, ScienceDirect, PubMed, Mendeley, Scopus, SpringerLink and JSTOR, were used to retrieve information published in journals, conference papers, books, scientific reports of international, regional and national organisations and research thesis to carry out using a systematic and comprehensive literature search. Preset searching keywords, such as '*Hedychium spicatum*', 'Kapoor kachari', 'Kapur-Kachari' and 'Van haldi', were used to explore the relevant papers. The first 100 results from each search engine were retrieved, and literatures directly relevant to the species were

collected. Some reputed libraries of the Himalayan region were also consulted for enhancing the scientific database of the species. The results were then cross-referenced to generate maximum number of publications available in the species, and a total number of 137 publications were used in this review (during the time span of 1930–2017). All the papers were arranged and categorised in different thematic areas (i.e. pharmacology; phytochemical analysis; antimicrobial and anthelmintic properties; molecular genetics and phylogeny; propagation, tissue culture and cultivation; and distribution, review and others). Chemical structures of some of the most important compounds present in essential oil were prepared with the help of the software 'Instant JChem' (version 6.2.1, Chem-Axon) with ChemDraw-like edit layout.

## Botany, Morphology and Occurrence

The plant is a leafy herb, up to 2 m tall, having a camphoraceous horizontal rhizome, sessile leaves, broadly lanceolate, 30–60 cm long with long clasping sheaths and up to 10 cm wide (Figure 1). Flowers are fragrant with pale yellow colour, up to 5 cm long corolla tube with pink base, enclosing white staminoidea and red anthers. The flowers are hermaphrodite.<sup>[9,11]</sup> The fruits are globose capsule, and three valves are reflected exposing numerous small seeds embedded in a red aril upon ripening. Flowering occurs in June to October and fruiting in October to November.<sup>[12]</sup> In the Himalayan region, the species is distributed in Jammu and Kashmir to Arunachal Pradesh including Nepal, Bhutan and also in Myanmar, North Thailand and some part of China.<sup>[18]</sup> The species is also reported from the hills of Thiruvananthapuram district of Kerala in south India (Figure 2).<sup>[19]</sup> It prefers sandy to sandy clay soil with

high moisture content, acidic in nature and a low content of organic carbon.<sup>[20]</sup>

The *Hedychium* genus is diploid with basic chromosome number of  $x = 9, 10, 11, 12, 14$  and  $17$ .<sup>[21,22]</sup> The chromosome number in *H. spicatum* has been found to be  $34$  ( $n = 17$ ).<sup>[23]</sup> Genome size (total genomic DNA content) of *H. spicatum* has been estimated as small as  $2.94$  pg (2C) or  $2875.32$  Mbp (2C) using a flow cytometer.<sup>[23]</sup> Histological studies of the species revealed that the rhizome consists of a delicate parenchyma. Most of the cells are loaded with starch grains, and a few contain a yellowish resin and essential oil. The epidermis is composed of several rows of compressed, nearly empty, reddish-brown cells.<sup>[24]</sup>

## Folk and Traditional Medicinal Uses

The Indian medicinal system (Ayurveda) described the species is useful in the treatment of swelling, asthma, fever, and pain,<sup>[25]</sup> which mean that 'Shati' (*H. spicatum*) is also known as Palashi, Shatgrantha Subratha, Gandhmulika, Gandharika, Gandhavadhu and Prathupalashika in Sanskrit language.<sup>[25,26]</sup> It has pungent, light, bitter, strong, heating properties and used in grime of mouth, swelling, cough, asthma, pain and hiccup.<sup>[9,16,25]</sup> *H. spicatum* is being used in different parts of the Indian subcontinent since ancient time and having different names in different parts of world. In Ayurvedic, literature species possess 'Rasa' (tastes) such as 'Katu' (pungent – stimulatory for digestion), 'Tikta' (Bitter – tends to fairly dry) and 'Kashaya' (astringent – effect on digestion); 'Guna' (properties) such as 'Laghu' (light – purification of body channels and developing vigour and joy of the body) and 'Teekshna' (penetrating – fast in action and helps in evacuation of the body); 'Veerya' (potency) such as 'Ushna' (heating);

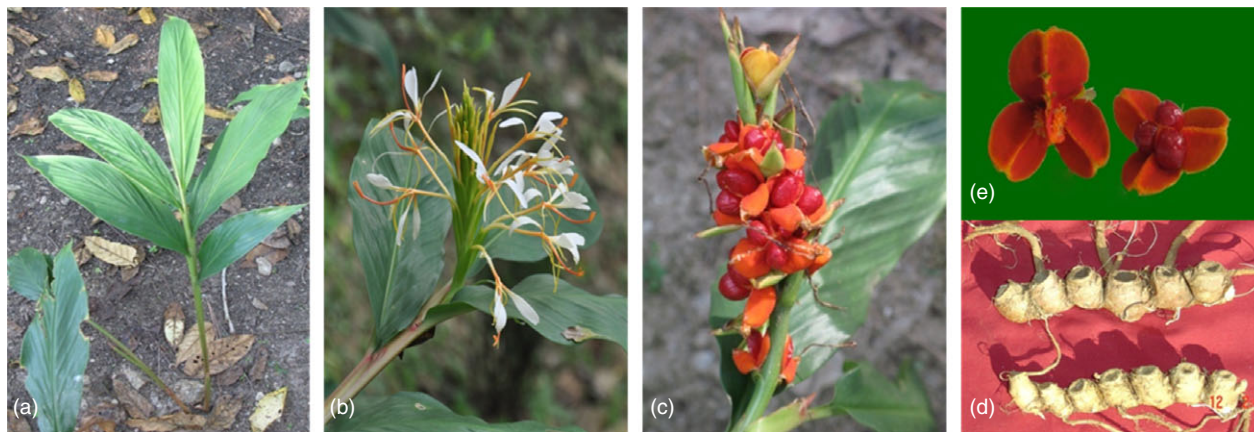

**Figure 1** Different growth stages of *Hedychium spicatum* (a) a growing plant in its natural condition; (b) inflorescence of the species with pale yellow flowers with pink base; (c) mature spike showing the ripened seeds; (d) rhizome of the species; and (e) numerous small seeds embedded in a red aril. [Colour figure can be viewed at wileyonlinelibrary.com]

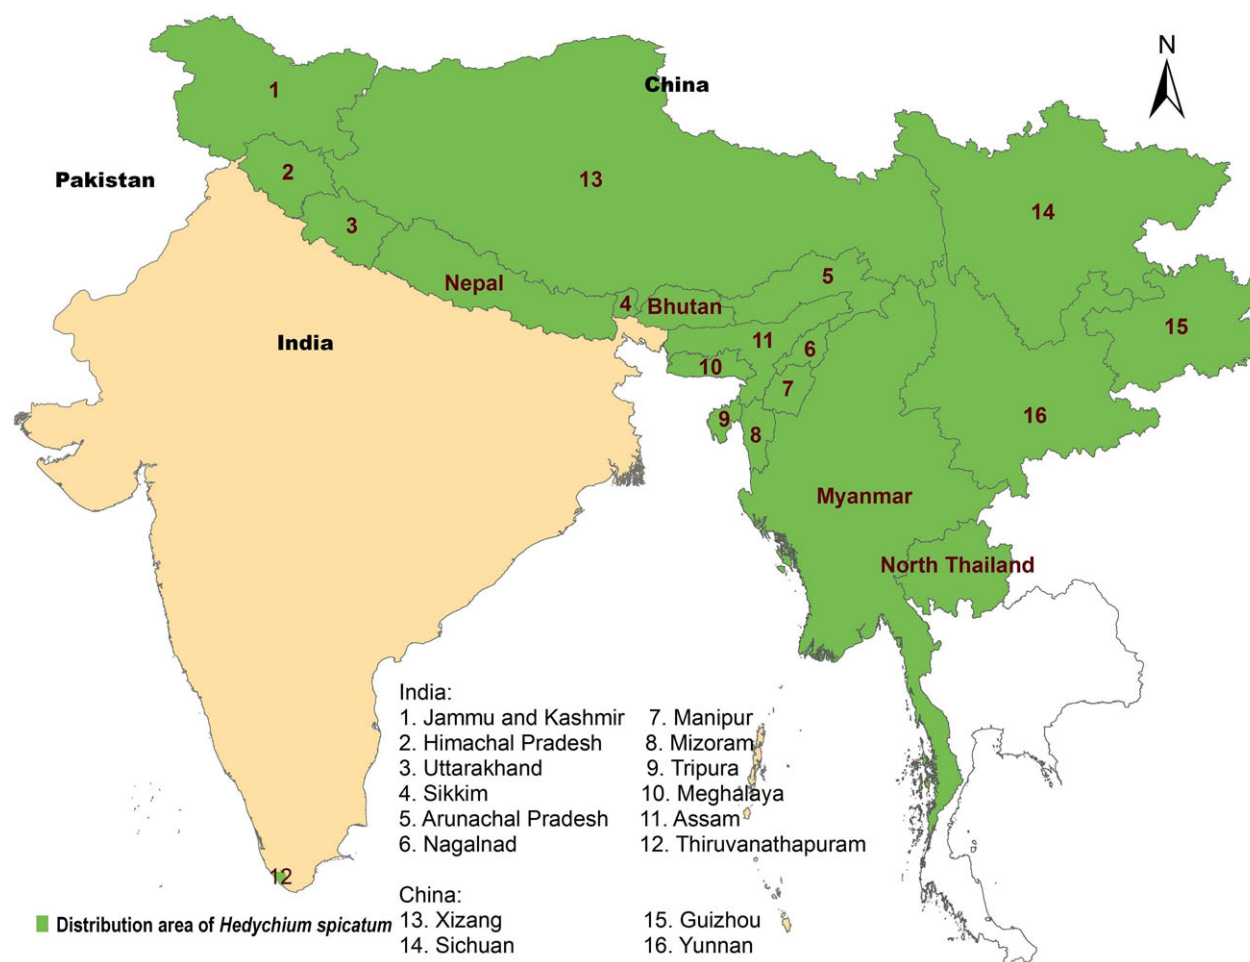

**Figure 2** Broad distribution range of *Hedychium spicatum* across the world (map not to the scale). [Colour figure can be viewed at [wiley-onlinelibrary.com](https://onlinelibrary.wiley.com/doi/10.1111/jcp.121747)]

'Rogaghnaata' (disease-curing properties) such as 'Sandhishotha' (swelling), 'Shoola' (pain), 'Dantashoola' (toothache), 'Mukhadurgandha' (halitosis), 'Vrana' (wound healing), 'Apatantraka' (apoplectic convulsions), 'Amavata' (rheumatoid arthritis), 'Aruchi' (tastelessness), 'Agnimandhya' (poor digestion), 'Adhamana' (flatulence), 'Udara-shoola' (colic pain), 'Atisara' (diarrhoea), 'Arsha' (piles), 'Raktavikara' (blood disorder), 'Pratishyaya' (allergic rhinitis), 'Kasa' (cough), 'Shwasa' (respiratory disorder) and 'Hikka' (hiccup).<sup>[16,25]</sup> Also, in Tibetan medicine system, this species is widely used in many formulations such as PADMA-28, which was revived in Poland and now used against chronic inflammatory diseases, peripheral vascular occlusive disease and revealed promising results in intermittent claudication, atherosclerosis and chronic active hepatitis.<sup>[27]</sup>

*Hedychium spicatum* is traditionally used to cure various diseases through various preparations in different parts of India (Table 1). The therapeutic properties of the species

are generally considered due to the presence of essential oil in the rhizomes. The rhizomes powder is used as an antimicrobial agent and as a poultice for various acnes and pains. The species is also an ingredient of some traditional Chinese medicine (TCM), Tibetan medicine and Unani medicinal system.<sup>[14]</sup> The powder as well as decoction of the rhizome is carminative, digestive and emmenagogue. A small cup of the rhizome decoction twice in a day is considered expectorant, stimulant, stomachic, tonic and vasodilator. One spoonful powder of rhizomes thrice a day is useful in the treatment of liver complaints and treating fever, vomiting, diarrhoea, inflammation, pain and snake bite. It is also used in the treatment of indigestion and poor circulation due to thickening of the blood.<sup>[14]</sup> The rhizome powder 3–4 g two times in a day is used in asthma, foul breath, bronchitis, hiccup, vomiting, tridosha and blood diseases. Rhizome powder is laxative to the bowel, and the rhizome decoction is tonic to the brain.<sup>[14]</sup> Also, the fruit of this species may be cooked and eaten with lentils in savoury



dishes.<sup>[28,29]</sup> Crushed dried rhizomes, both the bruised and the dried, are very aromatic with a fragrant, somewhat pungent smell similar to orris root but more powerful. The essential oil has a scent somewhat like hyacinths and highly perfumed for a considerable period. The dried rhizomes are also burnt as incense.<sup>[14]</sup>

In Tibetan medicine, the rhizome which has an acrid taste is given as two spoonful powder twice a day for heating potency. The species is widely used and shared in 19.43% of 175 known herbal formulations in Tibetan medicines.<sup>[14]</sup> In Indian medicines, the species finds place in 233 formulations and therapeutic index of its uses is 10.3%.<sup>[14]</sup> 'Abir', a fragrant coloured powder marketed for religious ceremonies, is prepared from its dried rhizomes.<sup>[18]</sup> In Andhra Pradesh, the dried rhizome is used in the treatment of asthma.<sup>[30]</sup> In the hills of Uttarakhand, rhizomes are boiled and eaten with salt, and the roasted powder is given for asthma, and decoction of rhizome with deodar sawdust for tuberculosis.<sup>[31,32]</sup> Powder of the species is used orally for body pain and inflammation; however, small pieces of

fresh roots cooked in burning flame and chewed with one glass of hot milk for the treatment of asthma and internal injury.<sup>[15,33]</sup> The rhizome is also chewed by the local inhabitants of Uttarakhand to remove the bad smell from their teeth or mouth. The paste of fresh rhizome is given orally with hot water to the cattle and other domestic animals in case of stomach disorder.<sup>[33]</sup> However, in Manipur, the rhizome is cooked to prepare chutney.<sup>[14]</sup> In Himachal Pradesh, leaves are used in making mats for the home, combined with wheat straw, enhancing the durability of the product.<sup>[14]</sup>

## Pharmacological Studies

This species is widely known as 'Kapur-kachari' in Ayurvedic preparations. The rhizomes are stomachic carminative, stimulant and tonic and are used in the treatment of dyspepsia, asthma and bronchitis.<sup>[34]</sup> Different biological and pharmacological properties of the species have been summarised in Table 2 and discussed below.

**Table 1** Traditional uses of *Hedychium spicatum* in different parts of India

| S.N | Plant part                   | Geographic Region    | Dose/mode of administration              | Used in                                                                                                                              | Reference |
|-----|------------------------------|----------------------|------------------------------------------|--------------------------------------------------------------------------------------------------------------------------------------|-----------|
| 1   | Rhizome powder               | Whole India          | –                                        | Antimicrobial agent, laxative to brain                                                                                               | [14]      |
| 2   | Rhizome poultice             | Whole India          | –                                        | Various acnes and pains                                                                                                              | [14]      |
| 3   | Rhizome powder and decoction | Whole India          | A small cup twice a day                  | Expectorent, stomachic, stimulant, tonic, vasodilator, carminative, expectorant and emmenagogue                                      | [14,15]   |
| 4   | Rhizome powder               | Whole India          | One spoonful powder three times in a day | Liver complains, fever, vomiting, diarrhoea, pain and inflammation, indigestion, poor circulation of blood due to thickness of blood | [14,15]   |
| 5   | Rhizome powder               | Whole India          | 4–5 mg three times in a day              | Asthma, foul breaths, bronchitis, hiccough and vomiting,                                                                             | [14,15]   |
| 6   | Decoction of rhizome         | Whole India          | With deodar sawdust                      | Tuberculosis                                                                                                                         | [32]      |
| 7   | Rhizome decoction            | Whole India          | –                                        | Tonic to brain                                                                                                                       | [14]      |
| 8   | Fruits                       | Whole India          | With lentils                             | Food                                                                                                                                 | [28,29]   |
| 9   | Dried and crushed rhizome    | Whole India          | Burnt                                    | Incense                                                                                                                              | [14]      |
| 10  | Fresh rhizome                | Whole India          | Isolated oil                             | Scent                                                                                                                                | [14]      |
| 11  | Rhizome powder               | Whole India          | Abir                                     | Dye                                                                                                                                  | [11]      |
| 12  | Rhizome paste                | Whole India          | –                                        | Hair loss                                                                                                                            |           |
| 13  | Rhizome powder               | Tibet                | Paste                                    | Heating impotency of female                                                                                                          | [14]      |
| 14  | Fresh rhizome                | Hills of Uttarakhand | Boiled with salt                         | Food                                                                                                                                 | [31]      |
| 15  | Roasted powder               | Hills of Uttarakhand | –                                        | Asthma                                                                                                                               | [14,32]   |
| 16  | Rhizome powder               | Andhra Pradesh       | –                                        | Asthma                                                                                                                               | [14,30]   |
| 17  | Root powder and small pieces | Hills of Uttarakhand | With milk                                | Chewed for asthma and internal injury                                                                                                | [33]      |
| 18  | Fresh rhizome                | Manipur              | Cooked for making Chutney                | Food                                                                                                                                 | [14]      |

## Anti-inflammatory activity

Alcoholic extract of the species possesses significant anti-inflammatory activity against carrageenan-induced hind-paw oedema in rat and mice. Hexane soluble extract showed the maximum activity of 42.16% in mice (200 mg/kg) and 27.2% in rats (100 mg/kg) compared to 37% of indomethacin (2 mg/kg) in mice and 27.2% of phenylbutazone (30 mg/kg) in rats.<sup>[35]</sup> The hexane and the benzene fractions of *Hedychium* inhibited the granuloma formation by 8 and 5%, respectively, at a dose of 200 mg/kg. Phenylbutazone (30 mg/kg) in the same experiment inhibited the granuloma formation by 25%. The ED<sub>50</sub> value of the hexane extract in the phenylquinone writhing test was 284.53, and benzene extract was 93.28.<sup>[35]</sup> In other experiment, alcoholic extract of plant suspended in Tween-80 was orally administered in Mice and Rats. In carrageenan-induced hind-paw oedema test, the alcoholic extract (30 mg/kg) significantly reduced the oedema volume. The percentage inhibition of oedema volume was 64.2%, while it reduced up to 49.1% in acetyl salicylic acid in a dose of 300 mg/kg.<sup>[36]</sup> The anti-inflammatory activity of the species was reported to be localised mainly due to furanoid diterpene compound 'Hedychinone', but a similar compound 7-hydroxy-hedychinone did not show any activity in mice as well as in rats.<sup>[36–38]</sup>

In another study, single dose of aqueous and ethanolic extracts (200 mg/kg) and indomethacin (10 mg/kg), 60 min before carrageenan administration in 18-h fasted rats, was administered orally. The volume of rat hind paw up to the ankle joint was measured plethysmographically by the mercury displacement method just after administration of 0.1 ml of 1% carrageenan (0 h) was recorded in a successive interval of 1 h, 2 h and 3 h and revealed a significant decrease in paw volume against carrageenan-induced inflammation from 1 h onwards to 3 h of the study period (% decrease in inflammation aqueous extract – 11.00–28.10%; ethanolic extract – 8.79–25.62%; indomethacin – 16.49–41.32%, respectively).<sup>[39]</sup>

## Analgesic activity

Analgesic activity of the species was demonstrated in acetic acid-induced writhing movements in mice and Randall–Selitto assay in rats. The ED<sub>50</sub> of the hexane fraction in the phenylquinone writhing test was  $284.53 \pm 2.06$  mg/kg while that of benzene extract was  $93.28 \pm 3.17$  mg/kg.<sup>[35]</sup> In other studies, using hot plate test method, the reaction time in control mice was 7.66 s, and extract (30, 100 and 300 mg/kg) did not prolonged the reaction time to thermal stimuli suggested lack of activity in morphine type of analgesia. While in acetic acid-induced writhing movement and

Randall–Sellitt assay, methods were used to test the peripheral analgesic activity of the extract. Effect of single oral dose at 30 and 100 mg/kg did not increase pain threshold as 1 h as compared to control value (60.83 g). However, extract (300 mg/kg) and aspirin (300 mg/kg) significantly decreased the pain threshold. Also, acetic acid-induced writhing count was 57.33, and administration of extract (300 mg/kg) and acetylsalicylic acid (300 mg/kg) significantly inhibited the writhing movements by 34.32 and 70.35, respectively. Thus, it concluded the peripheral analgesic activity of the plant.<sup>[36]</sup>

## Anti-asthmatic and anti-allergic activities

Studies reported that 10 mg of powdered rhizome daily dose in 25 patients was found useful in recurrent paroxysmal attacks of dyspnoea (bronchial asthma) and relieved completely in 4 weeks time. Bronchi disappeared completely in 36% patients, the mean R/R was reduced by 25%, the vital capacity increased by 20%, and the mean absolute count decreased by 55.6%.<sup>[40]</sup> In another clinical study of patients of tropical pulmonary eosinophilia, which were treated with the powder of *H. spicatum* in the dose of 6 g b.i.d. reported to reduce the eosinophil count by 60.54% after 4 weeks of treatment.<sup>[26]</sup> Different doses (100, 200 and 400 mg/kg) of aqueous and ethanolic extracts of *H. spicatum* administered orally to Guiana pigs (once daily for 7 days) indicated dose-dependent protection against histamine-induced bronchospasm in terms of increase in preconvulsive dyspnoea time from 39.2 to 75.1% and 25.8 to 65.1%, respectively, while chlorpheniramine maleate (2 mg/kg) showed an increase by 71.3% ( $P < 0.001$ ). The result indicated comparable effects of both the extracts with CPM, a known H<sub>1</sub> blocker.<sup>[39]</sup>

## Ulcer protection activity

Rats were fed with the extracts daily for 6 days, and after 7 day, rats were sacrificed. Results revealed dose-dependent protection against histamine-induced bronchospasm by increasing preconvulsive dyspnoea time from 39.2 to 75.1% ( $P < 0.05$  to  $P < 0.001$ ) and 25.8 to 65.1% ( $P < 0.1$  to  $P < 0.001$ ), respectively, while chlorpheniramine maleate (2 mg/kg) showed an increase by 71.3% ( $P < 0.001$ ).<sup>[35]</sup> In another study, both aqueous and ethanolic extracts (200 mg/kg) when administered orally, once daily, to GP for 7 days showed protection against histamine-induced gastric ulcer (H1 mediated) in GP, and the result showed comparable effects of aqueous (75% protection) and ethanolic extract (62.5% protection), while chlorpheniramine maleate (2 mg/kg) was able to protect 87.5% protection against gastric ulcers.<sup>[39]</sup>

### Blood pressure-lowering activity

Extracts of the rhizome showed blood pressure-lowering activity in the benzene and hexane extracts of the species.<sup>[35]</sup> For instance, benzene extract when administered to cats at doses of 10 and 25 mg/kg intravenous, it was observed that the lower dose of benzene extract raised the blood pressure by 24 mm Hg in 7 min, and at the higher dose (25 mg/kg), the blood pressure was lowered by 50 mm Hg in 30 min. However, the hexane extract lowered the blood pressure by 80 mm Hg for 16 min at 10 mg/kg and more at 25 mg/kg dose followed by hypotension lasting more than 30 min. However, no change was found in the response to adrenaline, acetylcholine, histamine and isoprenaline activity by both the extracts.<sup>[35]</sup>

### Hepatoprotective properties

The ethyl acetate and alcohol extracts of dried rhizomes were shown significant hepatoprotective activity, lowering the enzymes such as serum glutamate oxaloacetate transaminase (SGOT) and Serum Glutamate Pyruvate Transaminase (SGPT) in albino rats intoxicated with Carbon tetrachloride (CCl<sub>4</sub>) and also were comparable to marketed product.<sup>[41]</sup> In another study, the diterpene isolated from methanol extract of *H. spicatum* was subjected to *in-vitro* hepatoprotective activity using paracetamol-induced hepatotoxicity in primary rat hepatocytes by determining the change in hepatocytes viability and other parameters such as glutamic transaminase, glutamic pyruvic transaminase and total protein. The isolated diterpene showed significant protective effect by restoring altered parameters in the selected *in-vitro* model.<sup>[42]</sup> Another study demonstrated that hydroalcoholic extract of rhizomes of *H. spicatum* treatment restored depletion of liver antioxidants (superoxide dismutase, glutathione peroxidase and catalase) and prevents serum biomarkers (aspartate transferase, alanine aminotransferase, alkaline phosphatase and many others) significantly after both chloroform and paracetamol-induced hepatotoxicity in rat model.<sup>[43]</sup> The protective activity observed with hydroalcoholic extract of rhizomes (500 mg/kg, p.o.) was comparable to that of silymarin (100 mg/kg, p.o.).

### Anticancer and cytotoxic properties

Labdane diterpenes isolated from the rhizomes of the species showed cytotoxicity against the THP-1 (human acute monocytic leukaemia), HL-60 (human promyelocytic leukaemia), A-375 (human malignant melanoma), A-549 (human lung carcinoma) colon cancer (Colo-205), skin cancer (A-431), breast cancer (MCF-7), lung cancer (A-549) and Chinese hamster ovary cells (CHO cell lines) cancerous cell

lines.<sup>[44,45]</sup> More recently, volatile compounds in the essential oil of the rhizomes rich in 1,8-cineol, eudesmol, cubenol, spathulenol and  $\alpha$ -cadinol exhibited *in-vitro* cytotoxic activities against human cancer cell lines, such as the lung (A549), colon (DLD-1, SW620), breast (MCF-7, MDA-MB-231), head and neck (FaDu), and cervix (HeLa). Different essential oil samples exhibited different level of cytotoxic properties.<sup>[46]</sup>

### Antihyperglycaemic activity

Pretreatment of rats with hexane extract significantly reduced the sharp rise in blood glucose level for the first 30 min of poststarch feeding. To explore the mechanism of action of antihyperglycaemic activity, *in-vitro* rat intestinal  $\alpha$ -glucosidase inhibitory potential of this extract was carried out using *p*-nitrophenyl- $\alpha$ -D-glucopyranoside as substrate. It was found that hexane extract displayed 21.2% inhibition of the enzyme at primary screening concentration (100  $\mu$ g/ml). Some isolated compounds such as spicatanol and hedychenone showed antihyperglycaemic activity by inhibiting intestinal  $\alpha$ -glucosidase due to the presence of  $\alpha$ ,  $\beta$ -unsaturated  $\gamma$ -lactone and furan ring.<sup>[47]</sup>

### Nootropic effects and memory restorative activity

Study on n-butanol fraction of rhizomes has revealed some nootropic effects in experimental mice.<sup>[48]</sup> The elevated plus maze and double-unit mirrored chamber test were used to assess the nootropic effects of n-butanol fraction of the rhizomes. Results have confirmed the memory restorative activity, which highlighted the use of species for treatment of dementia during Alzheimer's disease. Preliminary results indicated the presence of saponins in the n-butanol extract using HPTLC.<sup>[48]</sup>

### Hair growth promoting activity

The hair growth promotion activity of hexane extract (33%) and pentadecane (30%) showed good reduction in hair growth time, where as minoxidil, a positive control, showed an excellent activity (47%) in the standard method, but it had other side effects. Even though the plant is being used in the preparation of hair oils, so far no reports on the compounds are responsible for hair growth promotion activity.<sup>[49]</sup>

### Toxicity studies

Toxicity studies of the species have not much been carried out. Only a published report stated that the hexane as well as benzene extracts had a weak CNS-depressant effect as

**Table 2** Pharmacological and medicinal properties of the species

| S.N. | Pharmacological properties | Responsible compounds /extract | Model         | Method                                                                                      | Description                                                                                                                                                                                                                                                                                                | Reference |
|------|----------------------------|--------------------------------|---------------|---------------------------------------------------------------------------------------------|------------------------------------------------------------------------------------------------------------------------------------------------------------------------------------------------------------------------------------------------------------------------------------------------------------|-----------|
| 1    | Anti-inflammatory activity | Hexane and benzene extract     | Mice and rats | Carrageenan-induced oedema and cotton pellet test                                           | Reduced 42.16% in mice (200 mg/kg) and 27.2% in rats (100 mg/kg) compared to 37% of indomethacin (2 mg/kg) in mice and 27.2% of phenylbutazone (30 mg/kg) in rats. Also, inhibited the granuloma formation by 8 and 5%, respectively, (200 mg/kg) compared to 25% in phenylbutazone (30 mg/kg).            | [35]      |
| 2    | Anti-inflammatory activity | Ethanol extract                | Mice and rats | Carrageenan-induced hind-paw oedema test                                                    | Ethanol extract (300 mg/kg) significantly reduced the oedema volume (64.2%) as compared to 49.1% in acetyl salicylic acid (300 mg/kg).                                                                                                                                                                     | [36]      |
| 3    | Anti-inflammatory activity | Aqueous and ethanolic extracts | Rat           | Hind paw up to the ankle joint measured plethysmographically by mercury displacement method | Percentage decrease in inflammation in aqueous extract was as 11.00 to 28.10%; ethanolic extract – 8.79–25.62%; indomethacin – 16.49–41.32%, respectively.                                                                                                                                                 | [37]      |
| 4    | Analgesic activity         | Hexane and benzene extract     | Mice          | Writhing movements assay                                                                    | The ED <sub>50</sub> of the hexane fraction in the phenylquinone writhing test was 284.53 mg/kg while that of benzene extract was 93.28 mg/kg.                                                                                                                                                             | [35]      |
| 5    | Analgesic activity         | Ethanol extract                | Mice and rats | Writhing movement and Randall–Sellitto assay                                                | Extract (300 mg/kg) and aspirin (300 mg/kg) significantly increased the pain threshold. Acetic acid-induced writhing count was 57.33, and administration of extract (300 mg/kg) and acetylsalicylic acid (300 mg/kg) acid significantly inhibited the writhing movements by 34.32 and 70.35, respectively. | [36]      |
| 6    | Ulcerogenic activity       | Hexane and benzene extract     | Rats          | Reduction in ulcerogenic index                                                              | Hexane extract had an ulcerogenic index of 0.08 while benzene extract had an index of 0.02. Phenylbutazone (30 mg/kg) gave an ulcerogenic index of 0.3.                                                                                                                                                    | [35]      |
| 7    | Ulcer protection activity  | Aqueous and ethanolic extracts | Guinea pigs   | Protection against histamine-induced gastric ulcer                                          | Protection against histamine-induced gastric ulcer (H1 mediated) in aqueous (75% protection) and ethanolic extract (62.5% protection) while chlorpheniramine maleate, (2 mg/kg) was able to protect 87.5% protection against gastric ulcers.                                                               | [39]      |
| 8    | Toxicity                   | Hexane and benzene extract     | Mice and rats | Acute toxicity                                                                              | Weak CNS-depressant effect and decreased locomotor activity at high doses 600 mg/kg as compared to the control. The lethal dose (LD <sub>50</sub> ) of both the extracts was more than 1000 mg/kg after 24 h with no mortality                                                                             | [35]      |



**Table 2** (Continued)

| S.N. | Pharmacological properties                | Responsible compounds /extract     | Model         | Method                                                                      | Description                                                                                                                                                                                                                                                                                                     | Reference |
|------|-------------------------------------------|------------------------------------|---------------|-----------------------------------------------------------------------------|-----------------------------------------------------------------------------------------------------------------------------------------------------------------------------------------------------------------------------------------------------------------------------------------------------------------|-----------|
| 9    | Toxicity                                  | Ethanol extract                    | Mice and rats | Acute toxicity                                                              | Graded dose of the extract (2.5 to 10 g/kg) did not produce any acute toxicity and death during 72 h of observation.                                                                                                                                                                                            | [37]      |
| 10   | Toxicity                                  | Hexane and benzene extract         | Mice and rats | Acute toxicity                                                              | No harmful effects were observed after acute toxicity study even with 10 times of the effective dose (2 g/kg) of the extracts.                                                                                                                                                                                  | [39]      |
| 11   | Anti-asthmatic activity                   | Aqueous and ethanolic extracts     | Humans        | Recovery from recurrent paroxysmal attacks of bronchial asthma              | Recurrent paroxysmal attacks of bronchial asthma completely relieved after 4 weeks, and bronchi disappeared completely in patients. The mean R/R was reduced by 25%, the vital capacity increased by 20%, and the mean absolute count decreased by 55.6%.                                                       | [40]      |
| 12   | Anti-asthmatic activity                   | Rhizome powder                     | Humans        | Reduction in eosinophil count                                               | A dose of 6 gm b.i.d. reduced the eosinophil count by 60.54% after 4 weeks of treatment.                                                                                                                                                                                                                        | [26]      |
| 13   | Anti-asthmatic and anti-allergic activity | Aqueous and ethanolic extracts     | Guinea pigs   | Protection against histamine-induced bronchospasm by preconvulsive dyspnoea | Dose-dependent protection against histamine-induced bronchospasm by increasing Preconvulsive dyspnoea time from 39.2 to 75.1% ( $P < 0.05$ to $P < 0.001$ ) and 25.8 to 65.1% ( $P < 0.1$ to $P < 0.001$ ), respectively, while chlorpheniramine maleate (2 mg/kg) showed an increase by 71.3% ( $P < 0.001$ ). | [39]      |
| 14   | Blood pressure-lowering activity          | Benzene and hexane extracts        | Cats          | Reduction in blood pressure                                                 | Hexane extract lowered the blood pressure by 80 mm Hg for 16 min (10 mg/kg) and sharp decrease in blood pressure lasting more than 30 min by 25 mg/kg dose.                                                                                                                                                     | [35]      |
| 16   | Anti-asthmatic activity                   | Ethyl acetate and alcohol extracts | Albino rats   | Enzymatic assays                                                            | Exhibited hepatoprotective activity by lowering Serum glutamate oxaloacetate transaminase (SGOT) and serum glutamate pyruvate transaminase (SGPT) enzymes intoxicated with chloroform.                                                                                                                          | [41]      |
| 17   | Hepatoprotective properties               | Methanol extract                   | Rats          | <i>In-vitro</i> activity against paracetamol-induced hepatotoxicity         | In paracetamol-induced hepatotoxicity in primary rat hepatocytes, isolated diterpene showed significant protective effect by restoring altered parameters in the selected <i>in-vitro</i> model.                                                                                                                | [42]      |

Table 2 (Continued)

| S.N. | Pharmacological properties                    | Responsible compounds /extract                | Model                 | Method                                                      | Description                                                                                                                                                                                                                                                                                                                                                      | Reference |
|------|-----------------------------------------------|-----------------------------------------------|-----------------------|-------------------------------------------------------------|------------------------------------------------------------------------------------------------------------------------------------------------------------------------------------------------------------------------------------------------------------------------------------------------------------------------------------------------------------------|-----------|
| 18   | Hepatoprotective properties                   | Hydroalcoholic extract                        | Rats                  | Recovery of serum antioxidant enzymes and biomarkers        | Restored depletion of liver antioxidants (superoxide dismutase, glutathione peroxidase and catalase) and prevents serum biomarkers (aspartate transferase, alanine aminotransferase, alkaline phosphatase, etc.) after chloroform and paracetamol-induced hepatotoxicity (500 mg/kg, p.o.) which was comparable to silymarin (100 mg/kg, p.o.).                  | [43]      |
| 19   | Anticancer and cytotoxic properties           | Labdane diterpenes                            | <i>In-vitro</i> cells | Cytotoxic activity against cancer cell lines                | Isolated labdane diterpenes showed cytotoxicity against the THP-1 (human acute monocytic leukaemia), HL-60 (human promyelocytic leukaemia), A-375 (human malignant melanoma), A-549 (human lung carcinoma) colon cancer (Colo-205), skin cancer (A-431), breast cancer (MCF-7), lung cancer (A-549) and Chinese hamster ovary cells (CHO cell lines) cell lines. | [44,45]   |
| 20   | Anticancer and cytotoxic properties           | Volatile compounds                            | <i>In-vitro</i> cells | Cytotoxic activity against cancer cell lines                | 1,8-cineole, eudesmol, cubenol, spathulenol and $\alpha$ -cadinol exhibited cytotoxic activities against human cancer cell lines that is the lung (A549), colon (DLD-1, SW620), breast (MCF-7, MDA-MB-231), head and neck (FaDu) and cervix (HeLa).                                                                                                              | [46]      |
| 21   | Antihyperglycaemic activity                   | Hexane extract and spicatanol and hedychenone | Rats                  | Protection against Histamine induced gastric ulcers         | Significantly reduced the sharp rise in blood glucose level for the first 30 min of poststarch feeding. Hexane extract (100 µg/ml) displayed 21.2% inhibition of the enzyme. Spicatanol and hedychenone also inhibited intestinal $\alpha$ -glucosidase.                                                                                                         | [47]      |
| 22   | Nootropic effects memory restorative activity | n-Butanol fraction                            | Mice                  | Maze and double-unit mirrored chamber test                  | n-Butanol fraction exhibited the memory restorative activity, thus, can be used for treatment of dementia during Alzheimer's disease.                                                                                                                                                                                                                            | [48]      |
| 23   | Tranquillising activity                       | Essential oil                                 | Rats                  | Reduction in secondary conditioned avoidance response (SCR) | 80% blockade in secondary conditioned avoidance response (SCR) and 40% inhibition in conditioned avoidance response which was compared to chloromazine.                                                                                                                                                                                                          | [50]      |
| 24   | Hair growth promoting activity                | Hexane extract and pentadecane                | Rats                  | Reduction in hair growth time                               | Reduction in hair growth time by hexane extract (33%) and Pentadecane (30%), where as minoxidil, a positive control showed an excellent activity (47%) in the standard method but it had other side effects.                                                                                                                                                     | [49]      |

Table 2 (Continued)

| S.N. | Pharmacological properties | Responsible compounds /extract | Model                                           | Method                                                                                                                    | Description                                                                                                                                                                                                       | Reference  |
|------|----------------------------|--------------------------------|-------------------------------------------------|---------------------------------------------------------------------------------------------------------------------------|-------------------------------------------------------------------------------------------------------------------------------------------------------------------------------------------------------------------|------------|
| 25   | Antioxidant activity       | Essential oil                  | <i>In-vitro</i>                                 | Radical scavenging activity                                                                                               | Strong antioxidant activities such as radical scavenging by ABTS, DPPH and FRAP assays, metal ion chelating and reducing properties.                                                                              | [10,51–54] |
| 26   | Antioxidant activity       | Solvent extracts               | <i>In-vitro</i>                                 | Radical scavenging activity                                                                                               | Methanolic extract of rhizome has also shown antioxidant properties using ABTS, DPPH and FRAP assays, which was attributed to the presence of phenolic compounds.                                                 | [9,55,56]  |
| 27   | Anthelmintic properties    | Essential oil                  | Earthworm, tapeworm, hookworm and nodular worms | Inhibitory activity against Earthworm, tapeworm, hookworm and nodular worms                                               | Higher anthelmintic activity of extract was reported than piperazine phosphate against earthworm and tapeworm.                                                                                                    | [67]       |
| 28   | Anthelmintic properties    | Ethanollic extracts            | <i>In-vitro</i>                                 | Inhibitory activity against <i>Pheretima posthuma</i>                                                                     | Death time was 146 min in extract and 124.83 min in albendazole at 25 mg/mL, while it was 137.5 min for extracts and 95.5 min for albendazole at 50 mg/mL.                                                        | [68]       |
| 29   | Anthelmintic properties    | Methanolic extracts            | <i>In-vitro</i>                                 | Inhibitory activity against <i>Pheretima posthuma</i>                                                                     | Time taken for <i>Pheretima posthuma</i> for paralysis and death was comparable with standard that is piperazine citrate.                                                                                         | [88]       |
| 30   | Fungitoxic property        | Essential oil                  | <i>In-vitro</i>                                 | Inhibitory activity against Various fungal strains                                                                        | Fungitoxic property of essential oil has also been reported.                                                                                                                                                      | [65]       |
| 31   | Antibacterial properties   | Various solvent extracts       | <i>In-vitro</i>                                 | Inhibitory activity against <i>Salmonella typhi</i> , <i>Escherichia coli</i> , <i>Streptococcus aureus</i> and others    | Inhibitory activity against Gram (+) and Gram (–) bacterium strain, including <i>Salmonella typhi</i> , <i>Escherichia coli</i> and a strain of methicillin- and vancomycin-resistant <i>Streptococcus aureus</i> | [61,63,76] |
| 32   | Antibacterial properties   | Essential oil                  | <i>In-vitro</i>                                 | Inhibitory activity against <i>Salmonella enterica enterica</i> .                                                         | Showed some antibacterial activity, by producing inhibition zones of 9–16 mm in diameter and found to be effective against <i>Salmonella enterica enterica</i> .                                                  | [51,60]    |
| 33   | Antifungal properties      | Various solvent extracts       | <i>In-vitro</i>                                 | Inhibitory activity against <i>Candida albicans</i> and <i>C. glabrata</i> .                                              | Inhibitory activity against many fungal strains such as <i>Candida albicans</i> and <i>C. glabrata</i> .                                                                                                          | [63,76]    |
| 34   | Antifungal properties      | Essential oil                  | <i>In-vitro</i>                                 | Inhibitory activity against <i>Aspergillus flavus</i> and <i>F. verticillioides</i>                                       | Totally inhibited the growth of pregerminated spores of <i>Aspergillus</i> that produce two major classes of mycotoxins, aflatoxin and fumonisin                                                                  | [66]       |
| 35   | Pediculicidal activity     | Essential oil                  | <i>In-vitro</i> assays                          | Inhibitory activity against <i>Pediculus humanus capitis</i> , <i>Phthirus pubis</i> and <i>Pediculus humanus humanus</i> | At 5, 2 and 1% concentration, the essential oil showed more significant activity than 1% permethrin-based product                                                                                                 | [70]       |

evidenced by decreased locomotor activity as compared to the control group, and it manifests only at high doses 600 mg/kg or more. The lethal dose (LD<sub>50</sub>) of both the extracts was more than 1000 mg/kg after 24 h, and there was no mortality even at this dose.<sup>[35]</sup> Also, in an acute toxicity experiments conducted by Tandan *et al.* (1997), graded dose of the methanolic extract (2.5 to 10 g/kg) did not produce any acute toxicity and death during 72 h of observation in rats.<sup>[36]</sup> Recently, no harmful effects were observed in the rhizome extracts of this plant after acute toxicity study even with 10 times of the effective dose of the extracts, indicating the safety status of its rhizomes.<sup>[39]</sup> Thus, mice tolerated very high dose of extract without producing, and harmful effect suggested that the extract possessed high level of safety.

### Tranquillising activity

The therapeutic activity of the rhizomes of the species was initially assumed due to the presence of essential oil, which showed mild tranquillising activity of short duration on central nervous system. Studies of the essential oil of *H. spicatum* rhizomes showed 80% blockade in secondary conditioned avoidance response (SCR) and 40% inhibition in conditioned avoidance response as compared to chlorpromazine in rats.<sup>[50]</sup>

### Antioxidant and radical scavenging properties

Essential oil obtained from rhizomes of *H. spicatum* has also shown strong antioxidant activities such as radical scavenging, metal ion chelating and reducing properties.<sup>[51,52]</sup> Methanolic extract of rhizome has also shown antioxidant properties, which was correlated with the presence of phenolic compounds.<sup>[10,53–55]</sup> A variation was recorded in antioxidant activity in essential oil and methanolic extract collected from different localities of Himalaya.<sup>[10,51,52]</sup> Other nonphenolic antioxidant compounds are also reported in its rhizomes such as xanthophylls,  $\alpha$ -carotene,  $\beta$ -carotene and DL- $\alpha$ -tachopherol etc.<sup>[56,57]</sup>

### Antimicrobial activity

Essential oil of the rhizomes possesses strong activity against a wide range of bacteria and fungus species.<sup>[51,58–64]</sup> Essential oil showed some antibacterial activity, by producing inhibition zones of 9–16 mm in diameter and found to be effective against *Salmonella enterica enterica*.<sup>[51]</sup> Extract of various solvents showed inhibitory activity against Gram (+) and Gram (–) bacterium strain, including a strain of methicilin- and vaneomycin-resistant *Streptococcus aureus* and fungal strains.<sup>[63]</sup> Fungitoxic property of essential oil

has also been reported.<sup>[65]</sup> Essential oil of the species totally inhibited the growth of pregerminated spores of *A. flavus* and *F. verticillioides* that produce two major classes of mycotoxins, aflatoxin and fumonisin.<sup>[66]</sup> Interestingly, plethora of studies is available on *in-vitro* activity of crude solvent extract, but none of these are focused on isolated compound or solvent fraction of the species.

### Anthelmintic and pediculicidal activity

Anthelmintic properties are also reported in the essential oil of the species. Higher anthelmintic activity was reported in extract of the species than piperazine phosphate against earthworm and tapeworm, but the activity against hookworm and nodular worm was lower than hexylresorcinol.<sup>[67]</sup> Also, at 25 mg/ml concentration of extract, death time of tapeworm was observed as  $146 \pm 2.83$  min in extract and  $124.83 \pm 6.99$  min in albendazole, while at 50 mg/ml concentration, activity against the worms was  $137.5 \pm 9.75$  min for extracts and  $95.5 \pm 4.84$  min for albendazole.<sup>[68]</sup> The anthelmintic activity of rhizomes of *H. spicatum* against adult Indian earthworms, *Pheretima posthuma*, was evaluated. The time taken for each worm for paralysis and death was determined. The results were compared with the standard, that is piperazine citrate. Methanol extract of produced dose-dependent anthelmintic activity where as aqueous extract was not all effective. Methanol extract showed better anthelmintic activity when compared with the standard drug piperazine citrate.<sup>[16,69]</sup> The rhizome of the species also has insect repelling activity, and essential oil of the species showed strong pediculicidal activity, which is required for the treatment of head lice infection. At 5, 2 and 1% concentration, the essential oil showed more significant activity than 1% permethrin-based product.<sup>[70]</sup>

### Phytochemical Studies

Rhizomes of *Hedychium* harbour various nutritionally and medicinally important compounds extracted in essential oil and solvent extract. Aromatic rootstock contains essential oil, saccharin, albumin, starch and mucilage. The essential oil obtained from the rhizome of the species founds as 0.06 to 6.12%<sup>[71]</sup> and 1,8-cineole (27–75%) exhibited as a major component.  $\alpha$ - and  $\beta$ -Pinene, linalool, 10-epi- $\gamma$ -eudesmol and  $\beta$ -siline were also reported from the essential oil of the rhizome in significant quality. Besides, (E)-caryophyllene, (-)-spathulenol, 1-epi-cubenol, 4-terpineol, 4-thujanol, borneol, camphene, camphor, caryophyllene oxide, cubebene, elemol, germacrene d-4-ol, hedycaryol, limonene, sabinene, spathulenol, terpine-4-ol,  $\alpha$ -cadinol,  $\alpha$ -eudesmol,  $\alpha$ -humulene,  $\alpha$ -selinene,  $\alpha$ -terpinene,  $\alpha$ -terpineol,  $\alpha$ -thujene,  $\beta$ -caryophyllene,  $\beta$ -cadinene,  $\beta$ -eudesmol,  $\beta$ -farnesene,  $\beta$ -himachalene,  $\beta$ -myrcene,



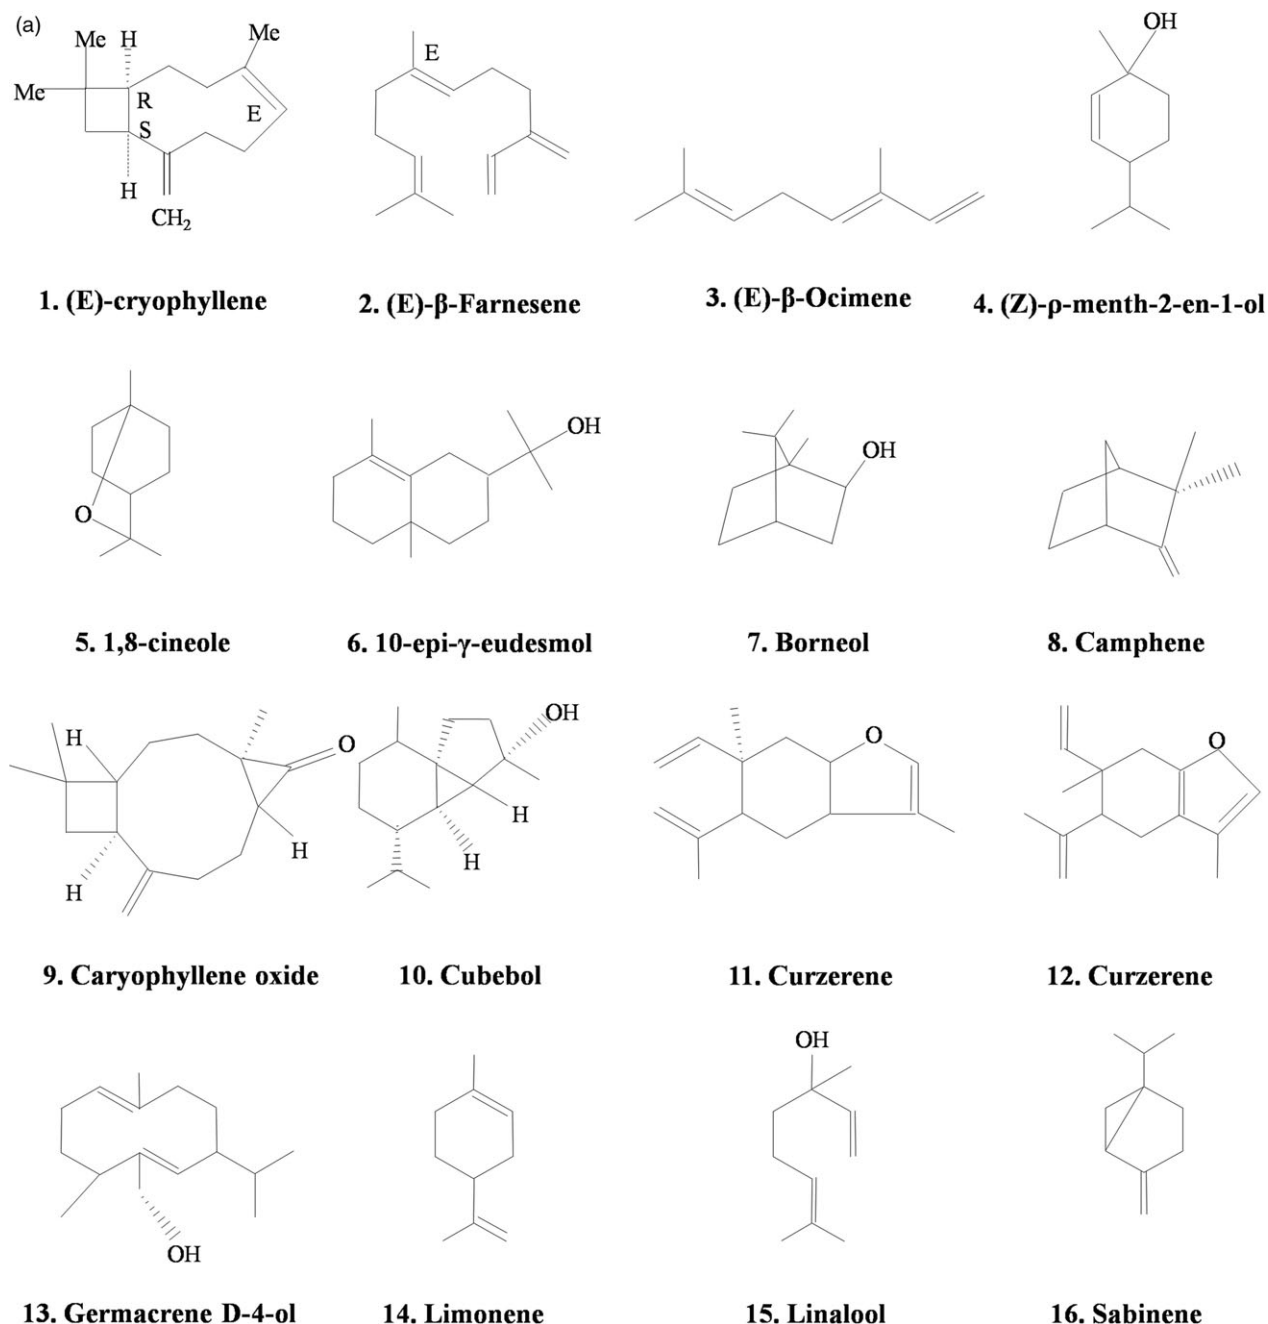

**Figure 3** (a, b) Structure of selected chemical compounds present in the essential oil of *Hedychium spicatum*.

$\beta$ -phellandrene,  $\gamma$ -muurolene, p-cymene and  $\delta$ -cadinene have also been reported in the essential oil of the species (Figure 3).<sup>[46,51,52,60,70–78]</sup> Variation in the essential oil components such as sabinene, trans-m-mentha-2,8-dienes, p-cymene, 1,8-cineole and terpine-4-ol in different species of *Hedychium* genus, that is *H. coronarium*, *H. aurantiacum*, *H. ellipticum* and *H. spicatum* from Uttarakhand Himalaya and *H. venustum*, *H. coronarium*,

*H. flavescens* and *H. spicatum* from south India, has been reported.<sup>[51,76,80]</sup> The essential oil obtained from leaves of the species showed higher amount of  $\beta$ -pinene (about 40%) as compared to rhizome essential oil, but 1,8-Cineole (11.9%) was found in lesser quantity.<sup>[77]</sup> A comparative composition of essential oil of rhizomes in different studies has been presented in Table 3. The essential oil of *H. spicatum* obtained from different

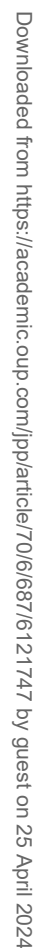

locations of Himalayan region has shown great variation in its components especially in 1,8-cineole, terpine-4-ol and 10-epi- $\gamma$ -eudesmol, eudesmol, cubenol, spathulenol and  $\alpha$ -cadinol,<sup>[46,51,52,78]</sup> thus, influenced its antioxidant properties,<sup>[51,52]</sup> antimicrobial properties<sup>[51,76]</sup> and cytotoxic properties.<sup>[46]</sup> Essential oil samples of *H. spicatum* rhizomes were carried out and found to be active against

various human cancer cell lines.<sup>[46]</sup> These location-specific and genotypic variations can be important for superior germplasm selection. Essential oil from *H. spicatum* inhibited the growth of pregerminated spores of *Aspergillus flavus* and *Fusarium verticillioides* two of the most important fungal species responsible for mycotoxin contamination of several food crops.<sup>[66]</sup>

**Table 3** Composition of essential oil in *Hedychium spicatum* revealed by different authors in different part of the world

| SN | Compounds name            | Garg et al. <sup>a</sup> (1977) [72] | Dixit et al. <sup>a</sup> (1977) [73] | Nigam et al. <sup>a</sup> (1979) [74] | Bottini et al. <sup>a</sup> (1987) [75] | Sabulal et al. <sup>a,b</sup> (2007) [76] | Joshi et al. <sup>a</sup> (2008) [51] | Verma et al. <sup>a</sup> (2010) [77] | Prakash et al. <sup>a</sup> (2010) [60] | Raina and Negi <sup>a</sup> (2015) [78] | Koundal et al. <sup>c</sup> (2015) [52] | Semwal et al. <sup>a</sup> (2015) [79] | Mishra et al. <sup>a</sup> (2016) [46] |
|----|---------------------------|--------------------------------------|---------------------------------------|---------------------------------------|-----------------------------------------|-------------------------------------------|---------------------------------------|---------------------------------------|-----------------------------------------|-----------------------------------------|-----------------------------------------|----------------------------------------|----------------------------------------|
| 1  | $\alpha$ -Phene           | 1.44                                 | 1.40                                  | 4.50                                  | –                                       | –                                         | 1.80–3.70                             | 0.70                                  | 1.10                                    | 0.10–4.40                               | 0.90–1.5                                | 9.12                                   | 0.00–0.53                              |
| 2  | $\alpha$ -Thujene         | –                                    | –                                     | –                                     | –                                       | –                                         | 0.10–5.80                             | –                                     | –                                       | –                                       | –                                       | –                                      | –                                      |
| 3  | Camphene                  | –                                    | –                                     | –                                     | –                                       | 0.30                                      | 0.10–0.40                             | –                                     | –                                       | 0.10–1.20                               | 0.00–0.10                               | –                                      | –                                      |
| 4  | Sabinene                  | –                                    | –                                     | –                                     | –                                       | 0.10                                      | 0.00–13.00                            | –                                     | –                                       | 0.10–1.30                               | 0.00–0.40                               | –                                      | –                                      |
| 5  | $\beta$ -Pinene           | 1.41                                 | 1.40                                  | –                                     | –                                       | 1.30                                      | 4.00–5.90                             | 1.60                                  | 1.40                                    | 0.50–3.20                               | 2.20–3.80                               | 9.24                                   | 0.13–0.67                              |
| 6  | Myrcene                   | –                                    | –                                     | –                                     | –                                       | 0.10                                      | –                                     | –                                     | –                                       | 0.60–2.50                               | 0.00–0.20                               | –                                      | –                                      |
| 7  | $\beta$ -Myrcene          | –                                    | –                                     | –                                     | –                                       | –                                         | 0.30–8.70                             | 0.10                                  | –                                       | –                                       | –                                       | –                                      | –                                      |
| 8  | $\alpha$ -Phellandrene    | –                                    | –                                     | –                                     | –                                       | 0.10                                      | –                                     | –                                     | –                                       | –                                       | –                                       | –                                      | –                                      |
| 9  | $\delta$ -2-Carene        | –                                    | –                                     | –                                     | –                                       | 0.10                                      | –                                     | –                                     | –                                       | –                                       | –                                       | –                                      | –                                      |
| 10 | $\alpha^3$ -Carene        | –                                    | 1.40                                  | 1.80                                  | –                                       | –                                         | –                                     | –                                     | –                                       | –                                       | –                                       | –                                      | –                                      |
| 11 | $\alpha$ -Terpinene       | –                                    | –                                     | –                                     | –                                       | 0.10                                      | –                                     | –                                     | –                                       | –                                       | –                                       | –                                      | –                                      |
| 12 | p-Cymene                  | 0.48                                 | 5.00                                  | 9.60                                  | –                                       | 0.10                                      | 0.00–0.70                             | 0.10                                  | –                                       | 0.30–1.10                               | –                                       | –                                      | –                                      |
| 13 | $\beta$ -Terpineol        | –                                    | –                                     | 1.80                                  | –                                       | –                                         | –                                     | –                                     | –                                       | –                                       | –                                       | –                                      | –                                      |
| 14 | Limonene                  | –                                    | 1.30                                  | 170                                   | –                                       | 0.50                                      | 0.00–0.20                             | 0.40                                  | –                                       | –                                       | –                                       | 6.42                                   | 0.08–0.60                              |
| 15 | 1,8-Cineole               | 56.25                                | 37.20                                 | 27.10                                 | 29.70                                   | 44.30                                     | 4.30–45.70                            | 64.00                                 | 17.60                                   | 15.50–58.20                             | 50.10–72.10                             | 30.84                                  | 5.00–25.78                             |
| 16 | (E)- $\beta$ -Ocimene     | –                                    | –                                     | –                                     | –                                       | –                                         | –                                     | 0.10                                  | –                                       | –                                       | –                                       | –                                      | –                                      |
| 17 | $\beta$ -Phellendrene     | –                                    | 4.50                                  | 7.00                                  | –                                       | –                                         | –                                     | 0.30                                  | –                                       | –                                       | –                                       | –                                      | –                                      |
| 18 | 4-Thujol                  | –                                    | –                                     | –                                     | –                                       | –                                         | –                                     | –                                     | –                                       | –                                       | –                                       | –                                      | 0.00–0.10                              |
| 19 | Cis-linalool oxide        | –                                    | –                                     | –                                     | –                                       | 0.20                                      | –                                     | –                                     | –                                       | –                                       | –                                       | –                                      | –                                      |
| 20 | $\gamma$ -terpinene       | –                                    | –                                     | –                                     | –                                       | 0.10                                      | –                                     | –                                     | –                                       | –                                       | –                                       | 4.30                                   | –                                      |
| 21 | trans-Linalool oxide      | –                                    | –                                     | –                                     | –                                       | 0.20                                      | –                                     | –                                     | –                                       | –                                       | –                                       | –                                      | –                                      |
| 22 | Terpinolene               | 0.17                                 | –                                     | –                                     | –                                       | –                                         | –                                     | –                                     | –                                       | –                                       | –                                       | –                                      | –                                      |
| 23 | Linalool                  | 6.75                                 | 18.00                                 | 16.60                                 | 4.40                                    | 25.60                                     | 0.60–6.40                             | 0.50                                  | 2.60                                    | 0.80–10.60                              | 0.80–2.80                               | 5.29                                   | 0.40–4.05                              |
| 24 | (Z)-p-menth-2-en-1-ol     | –                                    | –                                     | –                                     | –                                       | –                                         | –                                     | 0.70                                  | –                                       | –                                       | –                                       | –                                      | –                                      |
| 25 | Camphor                   | –                                    | –                                     | –                                     | –                                       | 0.40                                      | –                                     | –                                     | –                                       | –                                       | –                                       | 2.16                                   | –                                      |
| 26 | Borneol                   | 0.31                                 | –                                     | –                                     | –                                       | –                                         | 0.00–0.60                             | 0.10                                  | 0.10                                    | 0.40–2.70                               | –                                       | 1.53                                   | –                                      |
| 27 | $\delta$ -Terpineol       | –                                    | –                                     | –                                     | –                                       | 0.30                                      | –                                     | –                                     | –                                       | –                                       | –                                       | –                                      | –                                      |
| 28 | Terpin-4-ol               | –                                    | –                                     | –                                     | 0.70                                    | 1.30                                      | 0.90–16.50                            | 0.10                                  | 0.20                                    | 0.70–15.20                              | –                                       | –                                      | –                                      |
| 29 | 4-Terpineol               | –                                    | –                                     | –                                     | –                                       | –                                         | –                                     | –                                     | –                                       | –                                       | 0.50–1.00                               | –                                      | 0.17–0.51                              |
| 30 | $\alpha$ -Terpineol       | 1.56                                 | –                                     | 6.50                                  | 1.00                                    | 1.90                                      | 0.10–1.70                             | 0.20                                  | –                                       | 0.30–2.30                               | 1.40–1.80                               | 1.48                                   | 0.35–0.87                              |
| 31 | Copaene                   | –                                    | –                                     | –                                     | –                                       | –                                         | –                                     | –                                     | –                                       | –                                       | –                                       | –                                      | 0.03–0.59                              |
| 32 | $\alpha$ -Cubebene        | –                                    | –                                     | –                                     | –                                       | –                                         | –                                     | –                                     | 0.10                                    | –                                       | –                                       | –                                      | 0.00–0.10                              |
| 33 | Furfuryl hexanoate        | –                                    | –                                     | –                                     | –                                       | –                                         | –                                     | –                                     | 0.10                                    | –                                       | –                                       | –                                      | –                                      |
| 34 | $\beta$ -Cadinene         | –                                    | –                                     | –                                     | –                                       | –                                         | –                                     | –                                     | –                                       | –                                       | –                                       | –                                      | 1.74–6.77                              |
| 35 | $\beta$ -Elemene          | –                                    | –                                     | –                                     | –                                       | –                                         | –                                     | –                                     | 0.20                                    | –                                       | –                                       | –                                      | –                                      |
| 36 | $\alpha$ -Gurjunene       | –                                    | –                                     | –                                     | –                                       | –                                         | –                                     | –                                     | –                                       | –                                       | –                                       | 4.51                                   | –                                      |
| 37 | $\alpha$ -(Z)-Bergamotene | –                                    | –                                     | –                                     | –                                       | 0.70                                      | –                                     | –                                     | 0.10                                    | –                                       | –                                       | –                                      | –                                      |

Table 3 (Continued)

| SN | Compounds name             | Garg et al., <sup>a</sup> (1977) [72] | Dixit et al., <sup>a</sup> (1977) [73] | Nigam et al., <sup>a</sup> (1979) [74] | Bottini et al., <sup>a</sup> (1987) [75] | Sabulal et al., <sup>a,b</sup> (2007) [76] | Joshi et al., <sup>a</sup> (2008) [51] | Verma et al., <sup>a</sup> (2010) [77] | Prakash et al., <sup>a</sup> (2010) [60] | Raina et al., <sup>a</sup> and Negi, <sup>a</sup> (2015) [78] | Koundal et al., <sup>c</sup> (2015) [52] | Semwal et al., <sup>a</sup> (2015) [79] | Mishra et al., <sup>a</sup> (2016) [46] |
|----|----------------------------|---------------------------------------|----------------------------------------|----------------------------------------|------------------------------------------|--------------------------------------------|----------------------------------------|----------------------------------------|------------------------------------------|---------------------------------------------------------------|------------------------------------------|-----------------------------------------|-----------------------------------------|
| 38 | (Z)-Caryophyllene          | –                                     | –                                      | –                                      | –                                        | –                                          | –                                      | –                                      | 0.10                                     | –                                                             | –                                        | –                                       | –                                       |
| 39 | β-Caryophyllene            | 0.12                                  | 24.10                                  | 3.50                                   | –                                        | 0.20                                       | –                                      | 0.10                                   | 1.50                                     | 0.40–1.40                                                     | 0.20–0.70                                | –                                       | 0.57–1.46                               |
| 40 | α-Humulene                 | –                                     | –                                      | –                                      | –                                        | 0.30                                       | 0.00–0.50                              | 0.20                                   | 2.00                                     | 0.30–2.60                                                     | 0.30–1.20                                | –                                       | –                                       |
| 41 | α-Himachalene              | –                                     | –                                      | –                                      | –                                        | –                                          | –                                      | –                                      | 0.10                                     | –                                                             | –                                        | –                                       | –                                       |
| 42 | allo-aromadendrene         | –                                     | –                                      | –                                      | –                                        | 0.10                                       | –                                      | –                                      | –                                        | –                                                             | –                                        | –                                       | –                                       |
| 43 | 9-epi-β-caryophyllene      | –                                     | –                                      | –                                      | –                                        | 0.10                                       | –                                      | –                                      | –                                        | –                                                             | –                                        | –                                       | –                                       |
| 44 | Dehydroaromadendrane       | –                                     | –                                      | –                                      | –                                        | –                                          | –                                      | 1.00                                   | –                                        | –                                                             | –                                        | –                                       | –                                       |
| 45 | γ-Muurolene                | –                                     | –                                      | –                                      | –                                        | –                                          | –                                      | 0.10                                   | 1.50                                     | –                                                             | 0.00–0.60                                | –                                       | –                                       |
| 46 | β-Curcumene                | –                                     | –                                      | –                                      | –                                        | –                                          | 0.60–1.10                              | –                                      | –                                        | –                                                             | –                                        | –                                       | –                                       |
| 47 | β-Selinene                 | –                                     | –                                      | –                                      | –                                        | –                                          | 1.30–6.80                              | 2.30                                   | –                                        | 0.90–8.60                                                     | –                                        | –                                       | –                                       |
| 48 | epi-Cubebol                | –                                     | –                                      | –                                      | –                                        | 0.20                                       | –                                      | –                                      | –                                        | –                                                             | –                                        | –                                       | –                                       |
| 49 | α-Selinene                 | –                                     | –                                      | –                                      | –                                        | –                                          | 0.10–1.40                              | –                                      | 3.20                                     | 0.8–9.50                                                      | –                                        | –                                       | –                                       |
| 50 | Curzerene                  | –                                     | –                                      | –                                      | –                                        | –                                          | 0.20–1.20                              | –                                      | –                                        | –                                                             | –                                        | –                                       | –                                       |
| 51 | δ-Selinene                 | –                                     | –                                      | –                                      | –                                        | –                                          | –                                      | 4.40                                   | –                                        | –                                                             | –                                        | –                                       | –                                       |
| 52 | α-Muurolene                | –                                     | –                                      | –                                      | –                                        | 0.20                                       | –                                      | –                                      | –                                        | 1.50                                                          | –                                        | –                                       | 0.41–1.19                               |
| 53 | τ-Elemene                  | –                                     | –                                      | –                                      | –                                        | –                                          | –                                      | –                                      | –                                        | –                                                             | –                                        | –                                       | 0.00–0.57                               |
| 54 | Cubebol                    | –                                     | –                                      | –                                      | –                                        | –                                          | –                                      | –                                      | –                                        | –                                                             | –                                        | –                                       | 1.65–8.85                               |
| 55 | γ-Cadinene                 | 0.73                                  | –                                      | –                                      | –                                        | 0.30                                       | –                                      | –                                      | 5.40                                     | –                                                             | 0.30–1.70                                | –                                       | –                                       |
| 56 | Cubebol                    | –                                     | –                                      | –                                      | –                                        | –                                          | 0.00–0.80                              | –                                      | –                                        | –                                                             | –                                        | –                                       | –                                       |
| 57 | β-Farnesene                | –                                     | –                                      | –                                      | –                                        | –                                          | 0.00–2.00                              | –                                      | 0.10                                     | 0.70–3.90                                                     | 0.50–2.80                                | –                                       | 0.06–0.40                               |
| 58 | β-Himachalene              | –                                     | –                                      | –                                      | –                                        | 0.10                                       | –                                      | –                                      | –                                        | –                                                             | –                                        | –                                       | –                                       |
| 59 | δ-Cadinene                 | –                                     | –                                      | –                                      | –                                        | 0.90                                       | –                                      | –                                      | 7.50                                     | –                                                             | 0.90–5.90                                | –                                       | –                                       |
| 60 | Elenol                     | –                                     | –                                      | –                                      | –                                        | –                                          | –                                      | –                                      | –                                        | 0.70–16.60                                                    | 1.30–4.10                                | 3.31                                    | –                                       |
| 61 | (+)-Elemol                 | –                                     | 4.20                                   | –                                      | 8.50                                     | –                                          | –                                      | –                                      | –                                        | –                                                             | –                                        | –                                       | –                                       |
| 62 | trans-Nerolidol (furanoid) | –                                     | –                                      | –                                      | –                                        | –                                          | –                                      | –                                      | –                                        | –                                                             | –                                        | –                                       | 0.00–0.93                               |
| 63 | Hedycaryl                  | –                                     | –                                      | –                                      | –                                        | 2.60                                       | –                                      | –                                      | –                                        | –                                                             | –                                        | –                                       | 1.10–22.38                              |
| 64 | Germacrene D               | –                                     | –                                      | –                                      | –                                        | –                                          | –                                      | –                                      | –                                        | –                                                             | –                                        | –                                       | 0.00–0.38                               |
| 65 | cis-sesquisabinene hydrate | –                                     | –                                      | –                                      | –                                        | 0.70                                       | –                                      | –                                      | –                                        | –                                                             | –                                        | –                                       | –                                       |
| 66 | (-)-Spathulenol            | –                                     | –                                      | –                                      | –                                        | –                                          | –                                      | –                                      | –                                        | –                                                             | –                                        | –                                       | 1.67–13.83                              |
| 67 | Germacrene D-4-ol          | –                                     | –                                      | –                                      | –                                        | –                                          | 0.00–2.00                              | 1.50                                   | 6.80                                     | 0.40–2.10                                                     | 0.40–0.60                                | –                                       | 0.47–3.51                               |
| 68 | (E)-Nerolidol              | –                                     | –                                      | –                                      | –                                        | 0.30                                       | –                                      | –                                      | 0.60                                     | –                                                             | –                                        | –                                       | –                                       |
| 69 | Spathulenol                | –                                     | –                                      | –                                      | –                                        | 0.60                                       | –                                      | –                                      | –                                        | 0.60–3.50                                                     | –                                        | –                                       | –                                       |
| 70 | Caryophyllene oxide        | –                                     | 0.50                                   | –                                      | –                                        | 0.50                                       | –                                      | 1.30                                   | –                                        | 1.40–3.20                                                     | 0.00–0.50                                | –                                       | 0.04–0.23                               |
| 71 | Aromadendrene              | –                                     | –                                      | –                                      | –                                        | –                                          | –                                      | –                                      | –                                        | –                                                             | –                                        | –                                       | 0.00–0.18                               |
| 72 | Humulene epoxide II        | –                                     | –                                      | –                                      | –                                        | –                                          | –                                      | –                                      | –                                        | 0.70–3.10                                                     | –                                        | –                                       | –                                       |
| 73 | 10-epi-γ-eudesmol          | –                                     | –                                      | –                                      | 5.10                                     | –                                          | 1.20–12.40                             | 3.00                                   | 9.70                                     | 0.20–13.90                                                    | 1.00–5.70                                | –                                       | –                                       |
| 74 | γ-Eudesmol                 | –                                     | –                                      | –                                      | –                                        | –                                          | –                                      | –                                      | –                                        | 1.60–6.20                                                     | –                                        | –                                       | –                                       |



Table 3 (Continued)

| SN | Compounds name            | Garg et al., <sup>a</sup> (1977) [72] | Dixit et al., <sup>a</sup> (1977) [73] | Nigam et al., <sup>a</sup> (1979) [74] | Bottini et al., <sup>a</sup> (1987) [75] | Sabulal et al., <sup>a,b</sup> (2007) [76] | Joshi et al., <sup>a</sup> (2008) [51] | Verma et al., <sup>a</sup> (2010) [77] | Prakash et al., <sup>a</sup> (2010) [60] | Raina and Negi, <sup>a</sup> (2015) [78] | Koundal et al., <sup>c</sup> (2015) [52] | Semwal et al., <sup>a</sup> (2015) [79] | Mishra et al., <sup>a</sup> (2016) [46] |
|----|---------------------------|---------------------------------------|----------------------------------------|----------------------------------------|------------------------------------------|--------------------------------------------|----------------------------------------|----------------------------------------|------------------------------------------|------------------------------------------|------------------------------------------|-----------------------------------------|-----------------------------------------|
| 75 | Hinesol                   | -                                     | -                                      | -                                      | -                                        | -                                          | -                                      | -                                      | -                                        | -                                        | 0.90-2.30                                | -                                       | -                                       |
| 76 | 1-epi-Cubenol             | -                                     | -                                      | -                                      | -                                        | 0.50                                       | -                                      | -                                      | 6.90                                     | -                                        | -                                        | -                                       | -                                       |
| 77 | $\tau$ -Eudesmol          | -                                     | -                                      | -                                      | -                                        | -                                          | -                                      | -                                      | -                                        | -                                        | -                                        | -                                       | 0.00-12.35                              |
| 78 | epi- $\alpha$ -Cadinol    | -                                     | -                                      | -                                      | -                                        | -                                          | -                                      | 1.10                                   | -                                        | -                                        | -                                        | -                                       | -                                       |
| 79 | Eremoligenol              | -                                     | -                                      | -                                      | -                                        | 1.30                                       | -                                      | -                                      | -                                        | -                                        | -                                        | -                                       | -                                       |
| 80 | $\alpha$ -Cadinol         | -                                     | -                                      | -                                      | 5.30                                     | 2.30                                       | 1.20-3.30                              | 2.40                                   | -                                        | 4.50-11.20                               | -                                        | -                                       | -                                       |
| 81 | $\beta$ -Eudesmol         | -                                     | -                                      | -                                      | 12.60                                    | 2.20                                       | -                                      | 2.20                                   | 17                                       | 2.70-10.80                               | 5.70-14.70                               | 14.5                                    | 0.00-26.57                              |
| 82 | $\alpha$ -eudesmol        | -                                     | -                                      | -                                      | 4.80                                     | 2.30                                       | -                                      | -                                      | -                                        | -                                        | -                                        | 2.97                                    | 0.24-1.29                               |
| 83 | $\tau$ -Murolene          | -                                     | -                                      | -                                      | -                                        | -                                          | -                                      | -                                      | -                                        | -                                        | -                                        | -                                       | 0.00-0.98                               |
| 84 | $\tau$ -Murolol           | -                                     | -                                      | -                                      | -                                        | 4.40                                       | -                                      | -                                      | 0.50                                     | -                                        | -                                        | -                                       | 0.00-6.63                               |
| 85 | $\alpha$ -Copaene         | -                                     | -                                      | -                                      | -                                        | -                                          | -                                      | -                                      | -                                        | -                                        | -                                        | -                                       | -                                       |
| 86 | Agarospinol               | -                                     | -                                      | -                                      | -                                        | 0.90                                       | -                                      | -                                      | -                                        | -                                        | -                                        | -                                       | -                                       |
| 87 | 8-epi- $\beta$ -bisabolol | -                                     | -                                      | -                                      | -                                        | 0.50                                       | -                                      | -                                      | -                                        | -                                        | -                                        | -                                       | -                                       |
| 88 | Oplopanone                | -                                     | -                                      | -                                      | -                                        | -                                          | -                                      | -                                      | 0.10                                     | -                                        | -                                        | -                                       | -                                       |

<sup>a</sup>Population collected from Uttarakhand State of India (west Himalaya). <sup>b</sup>Populations collected from Kerala State of India (south India). <sup>c</sup>Populations collected from Himachal Pradesh State of India (west Himalaya).

Rhizome of the species possesses starch, resins, organic acids, ethyl esters of para-methoxy-cinnamic acid, d-sabinene sesquiterpenes.<sup>[12,24,81]</sup> Plethora of literature is available on chemical studies of this species (Table 4). Furanoid diterpene such as hedychenone and 7-hydroxyhedychenone was isolated from rhizome of the species, which is considered as one of the major active molecules in the species.<sup>[37,82]</sup> Sharma et al. (1975) found some terpinoids such as  $\beta$ -sitosterol in the benzene fraction of the rhizome.<sup>[83]</sup> Some labdane diterpenes and other diterpenes that is 9-hydroxy-hedychenone, chrysin, hedychilactone B, hedychilactone C, hedychilactone D, teptochrysin, yunnacoronarin A, 18-spicanol, 6-oxo-7,11,13-labdatrien-16,15-olide, 7-hydroxyhedychenone, hedychenone, spicanol methyl ether, 4-methoxy ethyl cinnamate, 7-hydroxy hydichinal, 8 (12)-drimene, coronarin-E, ethyl cinnamate, spicanol acid and yunnacoronarin-D have been isolated from rhizomes of the species (Table 4).<sup>[44,45,47]</sup> Recently, some more sesquiterpenes, such as 5,6-dehydro- $\alpha$ -eudesmol,  $\gamma$ -eudesmol, 3-hydroxy- $\gamma$ -eudesmol, anhuinosol, 1,2-dehydrocarrissonol, 4,15-epoxy-eudesmol, eudesma-4(15)-ene- $\beta$ -11diol, cryptomeridiol,  $\beta$ -eudesmol, 3-hydroxy- $\beta$ -eudesmol, mucrolidin, oplapanone,  $\alpha$ -terpineol, elemol, dehydrocarissone,  $\sigma^7$ - $\beta$ -eudesmol, opladiol, hydroxy-cryptomeridiol,  $\beta$ -caryophyllene oxide, coniferaldehyde and ethylferulate, have been isolated from the rhizome of the species.<sup>[84]</sup> Other compounds investigated in the species are phenolic content, xanthophylls,  $\alpha$ -carotene,  $\beta$ -carotene, DL- $\alpha$ -tocopherol, *p*-methoxy-cinnamic acid, pentadecane and ethyl *p*-methoxycinnamate.<sup>[49,56,81]</sup> Among these, many important secondary metabolites such as, phenolic content, xanthophylls,  $\alpha$ -carotene,  $\beta$ -carotene, DL- $\alpha$ -tocopherol and  $\gamma$ -tocopherol have been quantified in the species, which showed variation among different growing conditions, spatial or geographical distribution and seasons.<sup>[56,57,85,86]</sup> Recently, it has been reported that the accumulation of phenolic compounds in natural populations of the species is affected by genetic diversity pattern.<sup>[86]</sup> These variations provide opportunities for verity development for quality traits and standardisation of cultivation practices.

Two furanoid diterpenes, hedychenone and 7-hydroxyhedychenone isolated from the hexane fraction were tested for reduction in carrageenan-induced oedema, and hedychenone (2 mg/kg) had significant activity (38.65 and 20.4%), but 7-hydroxyhedychenone had no activity in mice as well as in rats.<sup>[35]</sup>  $\beta$ -Sitosterol isolated from the rhizome of the *H. spicatum* exhibited strong *in-vitro* anthelmintic activity against *Pheretima posthuma*. Molecular docking studies revealed that  $\beta$ -sitosterol binds very efficiently within the active pockets of tubulin, even better than the orientation of standard drug piperazine citrate.<sup>[69]</sup> Stigmasterol- $\beta$ -D-glucoside also revealed anthelmintic activity against *Pheretima posthuma* in similar manner.<sup>[88]</sup>

**Table 4** Phytochemical diversity in the *Hedychium spicatum*

| S.N. | Active constituents                      | Nature of compound | Reference |
|------|------------------------------------------|--------------------|-----------|
| 1    | Hedychenone                              | Furanoid diterpene | [37]      |
| 2    | 7-Hydroxyhedychenone                     | Furanoid diterpene | [78]      |
| 3    | 9-Hydroxy-hedychenone                    | Furanoid diterpene | [44]      |
| 4    | Chrysin                                  | Flavonoid          | [44]      |
| 5    | Hedychilactone B                         | Labdane diterpene  | [44]      |
| 6    | Hedychilactone C                         | Labdane diterpene  | [44]      |
| 7    | Hedychilactone D                         | Labdane diterpene  | [44]      |
| 8    | Teptochrysin                             | Flavonoid          | [44]      |
| 9    | Yunnacoronarin A                         | Labdane diterpene  | [44]      |
| 10   | 18-spicanol                              | Labdane diterpene  | [45]      |
| 11   | 6-Oxo-7,11,13-labdatrien-16,15-olide     | Labdane diterpene  | [45]      |
| 12   | Spicanol methyl ether                    | Labdane diterpene  | [45]      |
| 13   | 4-Methoxy ethyl cinnamate                | Phenolic compounds | [47]      |
| 14   | 7-Hydroxy hydichinal                     | Labdane diterpines | [47]      |
| 15   | 8(12) drimene                            | Labdane diterpene  | [47]      |
| 16   | Coronar-E                                | Labdane diterpene  | [44,47]   |
| 17   | Ethyl cinnamate                          | Phenolic compounds | [47,80]   |
| 18   | Spicanol acid                            | Labdane diterpene  | [47]      |
| 19   | Yunnacoronarin-D                         | Labdane diterpene  | [47]      |
| 20   | Ethyl- <i>trans-p</i> -methoxy cinnamate | Phenolic compound  | [84]      |
| 21   | Phenolic content                         | Phenolic compound  | [9,47]    |
| 22   | Xanthophylls                             | Carotenoids        | [47]      |
| 23   | $\alpha$ -Carotene                       | Carotenoids        | [47]      |
| 24   | $\beta$ -Carotene                        | Carotenoids        | [47]      |
| 25   | DL- $\alpha$ -tocopherol                 | Methylated phenol  | [47,84]   |
| 26   | $\gamma$ -Tocopherol                     | Methylated phenol  | [84]      |
| 27   | <i>p</i> -Methoxy cinnamic acid          | Phenolic compound  | [77]      |
| 28   | Pentadecane                              | Alkane hydrocarbon | [49]      |
| 29   | Ethyl <i>p</i> -methoxycinnamate         | Phenolic compound  | [49]      |
| 30   | $\beta$ -Sitosterol                      | Phytosterols       | [79,82]   |
| 31   | Lupeol                                   | Triterpenoid       | [82]      |
| 32   | Stigmasterol- D-glucoside                | Phytosterols       | [82]      |
| 33   | $\beta$ -Sitosterol- $\alpha$ -glucoside | Phytosterols       | [82]      |
| 34   | Ethylferulate                            | Sesquiterpene      | [80]      |
| 35   | 5,6-Dehydro- $\alpha$ -eudesmal          | Sesquiterpene      | [80]      |
| 36   | $\gamma$ -Eudesmal                       | Sesquiterpene      | [80]      |
| 37   | 3-Hydroxy- $\gamma$ -eudesmal            | Sesquiterpene      | [80]      |
| 38   | Anhuienosol                              | Sesquiterpene      | [80]      |
| 39   | 1,2-Dehydrocarrissonol                   | Sesquiterpene      | [80]      |
| 40   | 4,15-Epoxy-eudesmol                      | Sesquiterpene      | [80]      |
| 41   | Eudesma-4(15)-ene- $\beta$ -11 diol      | Sesquiterpene      | [80]      |
| 42   | Cryptomeridiol                           | Sesquiterpene      | [80]      |
| 43   | $\beta$ -Eudesmol                        | Sesquiterpene      | [80]      |
| 44   | 3-Hydroxy- $\beta$ -eudesmol             | Sesquiterpene      | [80]      |
| 45   | Mucrolidin                               | Sesquiterpene      | [80]      |
| 46   | Oplapanone                               | Sesquiterpene      | [80]      |
| 47   | $\alpha$ -Terpineol                      | Sesquiterpene      | [80]      |
| 48   | Elemol                                   | Sesquiterpene      | [80]      |
| 49   | Dehydrocarissone                         | Sesquiterpene      | [80]      |
| 50   | $\Delta^7$ - $\beta$ -Eudesmol           | Sesquiterpene      | [80]      |
| 51   | Opladiol                                 | Sesquiterpene      | [80]      |
| 52   | Hydroxy-cryptomeridiol                   | Sesquiterpene      | [80]      |
| 53   | $\beta$ -caryophyllene oxide             | Sesquiterpene      | [80]      |
| 54   | Coniferaldehyde                          | Sesquiterpene      | [80]      |

Isolated compounds from the species have been well-characterised for cytotoxicological studies with respect to their growth inhibitory properties against the A-549, SK-N-SH, MCF-7 and HeLa cancer cell lines. Results from a study revealed that structural differences in the labdane diterpenes significantly affected the anticancer activity. IC<sub>50</sub> values of *in-vitro* cytotoxicity were observed between 7.69 and 49.29 µg/ml for labdane diterpenes, and between 20.36 and 54.21 µg/ml for isoflavonoids against Colo-205 (colon cancer), A-431 (skin cancer), MCF-7 (breast cancer), A-549 (lung cancer) and CHO (Chinese hamster ovary cells) cell lines.

7-Hydroxy,6-oxo-7,11,13-labdatrien-16,15-olide exhibited significant activity on Colo-205, A-431 and MCF-7 and CHO cell lines and moderate activity on A-549 cell lines. 9-hydroxy,15,16-epoxy-7,11,13(16)14-labdatetraen-6-one also shown moderate activity Colo-205, A-431 and significant activity on CHO cell lines.<sup>[44]</sup> In another study, other labdane diterpenes isolated from the species, such as 7-hydroxy hedichinal-exhibited potent activity and spicatanic acid, showed moderate activities on the tested cell lines with the IC<sub>50</sub> value ranging from 14.14 µg/ml to 36.56 µg/ml. The furan moiety and hydroxyl group at C-7 position are markedly affected the activity profile of the labdane diterpenes class compounds. It is interesting that yunnacoronarin-D, the structural analogue of 7-hydroxy hedichinal, showed weak activity, and this may be due to lack of hydroxyl group at C-7 position.<sup>[45]</sup> Hedychenone, a labdane diterpenoid, showed potent *in-vitro* cytotoxic activity against cancerous cells. Structure–activity relationship studies indicated that furanoid ring has a greater impact on cytotoxicity than that of the decalone nucleus. However, dimerisation through C-8 significantly enhanced the cytotoxic activity of the hedychenone.<sup>[87]</sup> Sesquiterpenes isolated from the species, namely, anhuienosol, were the most cytotoxic against HeLa cells with IC<sub>50</sub> value of 0.30 µg/ml, followed by 5,6-dehydro- $\alpha$ -eudesmal and 1,2-dehydrocarrissonol, at 1.80 µg/ml. The hydroxyl group at C-1 significantly enhanced the cytotoxicity of anhuienosol against HeLa cell lines, which suggested that the relative hydrophilicity of this part of the molecule contributes to the activity and presence of the aldehyde group at C-4, and hydroxyl group at C-3 does not influenced the toxicities of the molecules.<sup>[84]</sup>

However, spicatanol, spicatanol methyl ether and hedychenone displayed most potent  $\alpha$ -glucosidase inhibitory activity (IC<sub>50</sub>, 34.1 µM). This reveals that the presence of  $\alpha,\beta$ -unsaturated  $\gamma$ -lactone and furan ring in labdane diterpenes is required for  $\alpha$ -glucosidase inhibition. The presence of –OH group at C-16 in lactone ring strongly increases enzyme inhibitory potential as against –OMe group.<sup>[47]</sup>

GC-MS analysis of fatty acid content obtained by head-space solid-phase microextraction of rhizome revealed the

presence of linoleic acid (18:2 $\omega$ 6),  $\alpha$ -linolenic acid (18:3 $\omega$ 3), oleic acid (18:1 $\omega$ 9), palmitic acid (16:0), stearic acid (18:0),  $\alpha$ -linolenic acid (18:3 $\omega$ 6), eicosanoic acid (20:0), eicosenoic acid (20:1) and eicosadienoic acid (20:2), etc. Among these linoleic acid (18:2 $\omega$ 6),  $\alpha$ -linolenic acid (18:3 $\omega$ 3) and oleic acid (18:1 $\omega$ 9) were found higher in wild plant material as compared to cultivated conditions.<sup>[57]</sup> Similarly, variation in  $\gamma$ -tocopherol,  $\alpha$ -tocopherol, hedychenone, ethyl-trans-*p*-methoxy cinnamate, ethyl cinnamate, d-sabinene and mineral content exhibited variation in wild and cultivated conditions.<sup>[56,57]</sup>

## Propagation, Variety Improvement and Market Demand

For extraction of active constituents, a large scale availability of quality material can be ensured by effective propagation methods. Propagation methods of the species at the commercial level have not been developed. Some tissue culture-based and small-scale nursery-based protocols are available which can be further scaled up for commercial level. Reports revealed that seed germination percentage enhanced using various hormonal concentrations and soil types in the field.<sup>[89]</sup> In an another study, Bisht *et al.* (2015) observed that in laboratory conditions, scarification of seeds and dark conditions during germination favours quick and uniform seed germination of this species as compared to light conditions.<sup>[90]</sup> Rana *et al.* (2004)<sup>[91]</sup> developed cultivation methods for propagation of the species in hilly regions. Some other authors reported that the maximum economic yield of rhizomes is obtained in the beds prepared on slope in comparison with beds prepared in plain, rows and furrows. However, best results are obtained in the bed prepared in slope and supplemented with forest litter.<sup>[92]</sup> Yield of the plant is influenced by plant distance in fields, and a higher plant-to-plant spacing (40 cm  $\times$  40 cm) provides more biomass and yield.<sup>[93]</sup> Bisht *et al.* (2015)<sup>[94]</sup> observed that the incubation of seeds in indole-acetic acid (100 µg/ml) for 24 h showed highest germination (95.83%) with mean germination time (84.00 days). On the contrary, nontreated seeds exhibited only 37.50–60.42% germination. Imbibitions by the seeds were fast in first 2 h, and then, it increased gradually up to 24 h, thus, confirming that 24 h is sufficient to imbibe the plant growth regulators (PGRs). PGRs are also found useful in reducing time for initiation of germination, time for maximum germination, mean germination time and germination rate. Furthermore, Giri and Tamta (2012) found that various presowing treatments, gibberellic acid (GA<sub>3</sub>) and potassium nitrate (KNO<sub>3</sub>) were significantly effective treatments regarding *in-vitro* seed germination of this species.<sup>[95]</sup> Similarly, incubation of seeds in indole-acetic acid (100 µg/ml) for 24 h showed highest germination of

95.83 ± 3.6% with mean germination time of 84.00 ± 7.0 days. On the contrary, nontreated seeds exhibited only 37.50–60.42% germination.<sup>[96]</sup> An another study showed maximum seed germination percentage (42.14 ± 26.42%) in garden soil with litter and farmyard manure (2 : 1 : 1, respectively) with higher plant height (8.35 ± 1.60 cm), leaf length (8.44 ± 0.99 cm), leaf width (3.73 ± 0.33 cm) and biomass parameters.<sup>[97]</sup> Also in another study, germination percentage was achieved up to 32.33% for different concentrations of IBA and IAA concentrations during 2004 and 2005, and higher concentration of IAA, IBA and NAA produced plant with higher height.<sup>[98]</sup>

Koul et al. (2005) established multiple shoots from pre-existing buds of the rhizome using MS medium supplemented with BAP and IAA<sup>[99]</sup> and successfully transferred to the field with 99% rooting and 80–85% field survival. Shoot elongation and higher shooting percentage were also reported in MS medium supplemented with 5.0 mM kinetin and 1.0 mM IAA.<sup>[32]</sup> Direct somatic embryos were developed by Giri and Tanta (2013) on cotyledon explants of zygotic embryos on MS supplemented with a high concentration of NAA (20.0 µM).<sup>[100]</sup> Induction of high frequency shoot multiplication (83.33%), number of shoots per explant (3.86 shoots) and average number of shoots per flask (19.33 shoots) were reported in selected cytokines combinations when seed raised shoot tips of the species were taken as explants.<sup>[101]</sup> *In-vitro* rooting was observed using lower concentration of indole-3-butyric acid (2.5 µM). Well rooted and healthy plantlets were obtained after 2 months of hardening and were then transferred to the field (1990 m) with 90.0% survival.<sup>[101]</sup> However, reports are limited on the effect of different propagation methods and treatment on quality of produce which ultimately determines the quality of product or formulation.

The genomic sequence information is very limited for this species, and only 28 nucleotide sequences are available in NCBI database (as on dated 20/12/2016); thus, sequence-specific markers are not easily available. Hence, marker-assisted selection (MAS) and breeding for quality improvement are not possible in the species. The cultivar of the species 'Himkachari' has been released by CSIR-IHBT, Palampur, (Himachal Pradesh, India), in 2006. The crop was harvested after 2 years of growth in the field and has a good average yield of fresh rhizomes and essential oil on a dry weight basis.<sup>[102]</sup> Still, the species is harvested from the wild thus causing vulnerability in its wild stock. Considering this, the species has been prioritised by Government of India and Government of Uttarakhand state for cultivation and conservation.<sup>[103,104]</sup> Market value of the species varies among the different parts of the country ranging from Rs. 25 to 40 per kg.<sup>[105]</sup> It is estimated that in India, annual demand of the species is

approximately 400 tons per year.<sup>[106]</sup> Trade and economics of the species are highly influenced by adulterants of the herb. *Kaempferia galangal*, *Zingiber officinale* and *Curcuma zedoria* are mostly used as adulterants along with *H. spicatum*.<sup>[107]</sup> *H. spicatum* has a good market potential in India as demand is increasing rapidly.

Rhizomes of the species are marketed from different Himalayan regions.<sup>[24]</sup> Large traders often employ local agents to collect raw material from villagers, who are lured economically for *in situ* harvesting. In Himachal Pradesh, the species is mentioned under export permit after 1993 by the State Forest Department with Rs. 70 per quintal royalties. In Sikkim, by 2001, the state government has completely banned the harvesting of herbs from the wild due to fast depletion in the wild.<sup>[14]</sup> Overexploitation of the species for its valuable medicinal properties by pharmaceutical, essential oil and other industries indicates the severe threat to its existence. *H. spicatum* has become a vulnerable oil-bearing plant due to reduction in its populations by more than 20% in last 10 years.<sup>[12,99,108]</sup> Therefore, there is an urgent need to develop agrotechniques of the species so that demand of the species can be fulfilled, and pressure in its natural habitat can be reduced.

## Future Prospective and Conclusion

The species is used for the treatment of inflammation, pain, asthma, foul breath, fever, vomiting, diarrhoea, bronchitis, hiccup, vomiting and diseases of blood, some of which (e.g. anti-inflammatory, analgesic, anti-asthmatic, etc.) are validated pharmacological and clinical assays. However, recent research on *H. spicatum* largely focused on assessing the antidiabetic, cytotoxic, antimicrobial, anthelmintic activity, which sometime seems irrelevant to its traditional uses. The labdane terpene, hedychinone, polyphenols and terpenoids appear to be the major constituents in the species. Although contemporary research involving in the species is promising, it is too preliminary and sometimes too general to be used to explain and support some of the ethnomedicinal uses. In addition, some of the pharmacological activities assessed so far, for example, antimicrobial, antioxidant, cytotoxic and antiproliferative, were routine screenings lacking molecular mechanisms of the pharmacological effects of the species.

The pharmacological and medicinal studies of *H. spicatum* highlight the immense potential of this plant for the treatment of various ailments. All the marketed products of the species are available in the form of polyherbal formulations. Therefore, it is difficult to attribute a particular phytochemical of an herb for a specific property. Also, plant extracts are a complex mixture of phytochemicals; therefore, a particular pharmacological property may be due to synergistic effect of existing constituents of the species. All



such issues can be addressed by adopting a system biology approach, wherein a very large number of components at the level of genome, transcriptome, proteome and metabolome, as well as physiological parameters, bioactivity, etc. can be studied to infer correlations to understand the mechanism of action. A key technology in the system biology is metabolomics, which allows for the identification and quantification of metabolites of the cell.<sup>[109]</sup> Adverse effects of the species in different conditions have not been determined; however, this is desirable for drug safety, for both polyherbal formulations and single phytochemical-based drug. Generally, it has been hypothesised that a particular compound-rich fraction/extract of the species may be responsible for a particular activity,<sup>[35,44,45,47]</sup> but actual and reasonable action mechanism has not been understood and needs to be addressed immediately. Similarly, statistical significant difference and relationships among phytochemicals with any activity have not been mentioned, as a result, efficacy of the drug for a particular property can not be estimated.

Effectiveness of medicinal plants depends upon amount of active constituents present in the species, which may be highly influenced by different factors such as, growing conditions, seasons, climatic conditions, sun light exposure, altitude, along with genetic make-up etc.<sup>[10,56,85,86,110–114]</sup> Therefore, selection of elite plants is essentially required, which contain higher phytochemical content and good pharmacological activity for obtaining maximum benefits. Elite individuals/genotypes can be selected on the basis of high quantity of active ingredient, which may be further confirmed through molecular studies. Marker-assisted selection for high-yielding varieties/genotypes is another popular technique that can be used. Thereafter, elites may be propagated through micropropagation or conventional methods. Tissue culture has some advantages over conventional methods. It provides clonally uniform genotypes for constant supply of plants for commercial production of active principles. It also helps stabilise any seasonality and geographical changes on active principles. It will create a sound platform for conservation strategies of species under natural conditions, as well as creating opportunities for generating income. Controlled growth system for cultivation also made it feasible to contemplate manipulation of phenotypic variation in the context of medicinally important phytochemicals and uniform supply of the raw material. It also increases productivity and reduces the level of undesired compounds, thus, increasing uniformity and predictability of the extract.<sup>[113]</sup>

This species has a great prospect for future due to its increasing demand. Sustainable multiplication of the species may be adopted if a suitable cultivation/agrotechnique could be developed. This can be achieved by plant breeding,

which essentially requires identification of the genetic variation of traits and knowledge of the impact of environmental parameters on its expression. Variation in antioxidant properties, essential oil composition, phenolic content and other phytochemical composition in different population and geographic location provides baseline data for future breeding programmes for variety improvement and suitable conditions for cultivation.<sup>[9,42,46,52]</sup> Variation in these constituents can be used for breeding programmes as the success of any breeding programme depends on identifying the genetic variation in traits and knowledge of the impact of environmental parameters on its expression.<sup>[61,114]</sup> A great variation was also observed in certain phytochemicals such as total phenolic compounds and antioxidant activity in plant material collected from different sites of Uttarakhand, Himalaya and different development stages.<sup>[10,86]</sup> These studies might be more relevant in relation to genetic make-up of the species which showed a high variability among the populations. Moderate genetic differentiation and high genetic diversity have been detected among populations of the species using isozyme markers.<sup>[115]</sup> Similarly, genetic diversity analysis by RAPD markers showed a high genetic diversity among the populations.<sup>[116]</sup> It assured future research for development of high-yielding varieties. Due to limited availability of sequence information in NCBI database, specific and functional genetic markers are not easy to develop for diversity characterisation, marker-assisted selection and genetic mapping.

*H. spicatum* is gaining attention of researchers due to its high market demand, and there has been an acceleration of publications of the species since 2006 (Figure 4a). The literature available on the species indicate that research has focused on phytochemical (~32.8%); followed by pharmacological studies (~25.5%); antimicrobial, and insecticidal activity (~15.3%); and propagation/tissue culture (~12.4%); distribution and other reviews (~7.3%); and molecular biology or modern technological interventions for its varietal improvement (~6.6%) (Figure 4b). Interestingly, traditional medicinal uses of the species were validated by determining pharmacological properties earlier (in 1980s and 1990s), and modern research (after 2000) is largely focused on routine screening of some generalised pharmacological properties. Modern biotechnological tools may be adopted for elite population/genotype selection, which may be used for further breeding programmes. Next-generation sequencing (NGS)-based RNA-seq/ transcriptome analysis may provide deeper insight for biosynthesis of active metabolites, which can be utilised for quality improvement by pathway engineering, transgenic development and genetic mapping in such nonreference crop species. These modern biotechnological tools provide opportunities to understand the regulatory mechanism of key genes

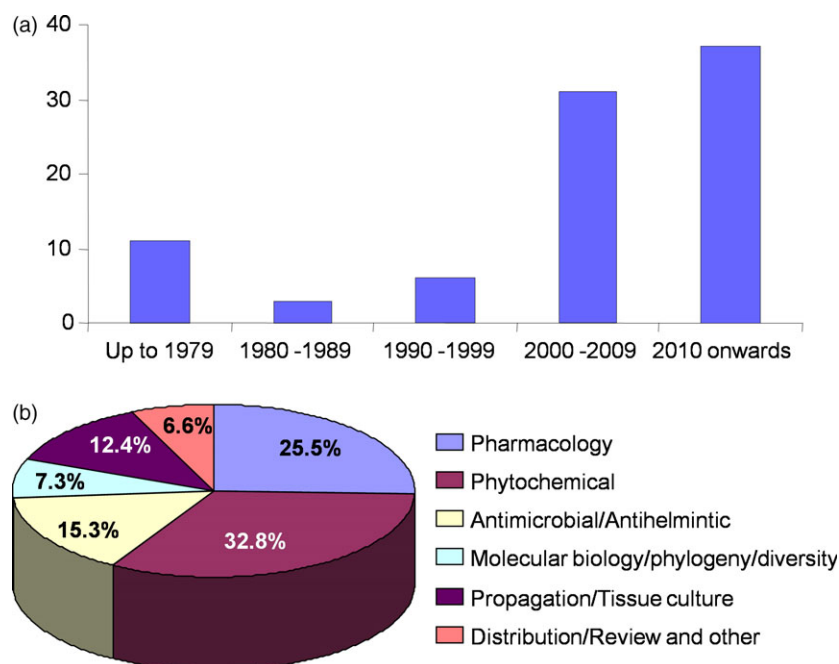

**Figure 4** Publication in *Hedychium spicatum* (a) trend of research output (publications) during different time periods up to 2015; and (b) categorisation of research papers available in the species into different subject area. [Colour figure can be viewed at [wileyonlinelibrary.com](http://wileyonlinelibrary.com)]

responsible for biosynthesis of active molecules in this species. So, pathway engineering may be a suitable tool for maximising the level of important compounds. On the other hand, different environmental conditions may alter species phenology, chemical composition, change in physiological and biochemical responses, level of enzymes, gene expression, metabolites, etc., which may result altered pharmacological effects. Recently researches have applied different stresses during the cultivation of medicinal plants for stimulating accumulation of pharmaceutical products and essential oils.<sup>[117]</sup> Thus, optimisation of a suitable agrotechnique will have additional benefits for quality planting material with higher productivity.

This review has revealed *H. spicatum* as a highly important medicinal plant exhibiting valuable pharmacological properties. Literature reveals that the species is lacking in exact scientific basis of the beneficial properties. Although, these distinct biological properties identified in this species also opened new door way for its new applications. The mentioned phytochemical constituents such as phenolic and flavonoids compounds; and related pharmacological activities such as antimicrobial, anti-inflammatory and antioxidant activity have

provided some suggestive scientific evidence for the various ethnomedicinal uses of the species in the treatment, control and management of infections diseases, diarrhoea and spoilage of its food products. Therefore, thorough studies to explain its medicinal properties are urgently needed. It would be worthwhile embarking on intensive scientific experimentation and investigations on advanced cultivation technologies, genetic inheritance of traits, phytochemical investigation, bioactivity and pharmacology so as real potential of species can be harnessed.

## Declarations

### Conflict of interest

The authors declare no conflict of interest.

### Acknowledgements

Partial financial support from Department of Science and Technology, Govt of India (File No. SB/YS/LS-384/2013), Uttarakhand Council of Biotechnology (project no: UCB/R&D Project/2016/01, and GBPHIHESD (CBCM-LTEM project) are greatly acknowledged.

## References

- Vieira RF, Skorupa LA. Brazilian medicinal plant gene bank. *Acta Hort* 1993; 330: 51–58.
- Singhal S, Agrawal A. Industrial utilization and promotion of medicinal plants in India. In: Chopra AK, Khanna DR, Prasad G, Malik DS, Bhutiani R, eds. *Medicinal Plant: Conservation Cultivation and Utilization*. New Delhi, India: Daya Publishing House, 2007: 325–330.
- Constable F. Medicinal plant biotechnology. *Planta Med* 1990; 56: 421–425.
- Sirirugsa P. *Thai Zingiberaceae: species diversity and their uses. Lecture presented in international conference on biodiversity and bioresources: Conservation and Utilization* (23–27 Nov., 1997), Phuket, Thailand, 1997; (<http://www.iupac.org/symposia/proceedings97/sirrugsa.html>).
- Prakash V, Mehrotra BN. Zingiberaceae of north-east India: diversity and taxonomic status. In: Proceedings of the 2nd Symposium on the Family Zingiberaceae, 1995: 262–273.
- Jain SK, Prakash V. Zingiberaceae in India: phytogeography and endemism. *Rheede* 1995; 5: 154–159.
- Basak S et al. Genetic diversity and relationship of *Hedychium* from Northeast India as dissected using PCA analysis and hierarchical clustering. *Meta Gene* 2014; 2: 459–468.
- Wood TH et al. Phylogeny of *Hedychium* and related genera (Zingiberaceae) based on ITS sequence data. *Edinburgh J Bot* 2000; 57: 261–270.
- Kirtikar RK, Basu BD. *Indian Himalayan Medicinal Plants*. New Delhi, India: Bishan Singh Mahendra Pal Singh Publishers, 1975.
- Rawat S et al. Total phenolic compounds and antioxidant potential of *Hedychium spicatum* Buch. Ham. ex D. Don in west Himalaya, India. *J Food Compos Anal* 2011; 24: 574–579.
- Anonymous. *The Wealth of India: A Dictionary of Indian Raw Material and Industrial Products Raw Material* (Vol. V). New Delhi, India: Council of Scientific and Industrial Research, 1959: 13.
- Chopra RN et al. *Glossary of Indian Medicinal Plants*. New Delhi, India: Council of Scientific and Industrial Research, 1986: 130–131.
- CAMP (Conservation assessment and management prioritization). For the medicinal plants of Himachal Pradesh, Jammu & Kashmir and Uttarakhand. In: Proceedings of the Workshop held at Shimla. Hosted by Foundation for Revitalization of Local Health Traditions (FRLHT), Bangalore, India, 2003.
- Badola HK. *Hedychium spicatum*-a commercial Himalayan herb needs internship at local level. *Non-Wood News* 2009; 19: 26–27.
- Giri D et al. A review on medicinal value of *Hedychium spicatum* Buch-Ham ex Sm: vulnerable medicinal plant. *J Med Plant Res* 2010; 4: 2773–2777.
- Srivani T, Paarekh PM. *Hedychium spicatum* Buch.Ham. An overview. *Pharmacognosyoneline* 2011; 2: 633–642.
- Herwade HS, Mandavkar KC. A review on *Hedichium spicatum* – Shati. *Int Ayurvedic Med J* 2015; 12: 2532–2535.
- Wu ZY, Raven PH. *Flora of China* (Vol. 24). St. Louis: Scientific Press Beijing and Missouri Botanical Garden Press, 2000.
- Sabu M. *Hedychium spicatum* Ham. Ex Smith ver. acuminatum (Roscoe) Wall.- a new record for peninsular India. *Rheede* 2000; 10: 73–76.
- Bisht AS. Ecological analysis of *Hedychium spicatum* Buch in temperate region of Garhwal Himalaya, Uttarakhand, India. *Med Plants - Int J Phytomed Relat Ind* 2015; 7: 120–127.
- Chen ZY, Chen SJ. The taxonomic significance of chromosome numbers in Zingiberaceae. In: Shui H, Tanaka R, Chen R, eds. *Proceeding of the Sino-Japanese Symposium on Plant Chromosomes*. Beijing: Academic Press, 1987: 107–114.
- Chen ZY. Evolutionary pattern in cytology and pollen structure of Asia Zingiberaceae. In: Holm-Nielsen H, Nielsen IC, Balslev H, eds. *Tropical Forest*. Beijing: Academic Press, 1989: 185–191.
- Nag A et al. Estimation of nuclear genome size of important medicinal plant species from western Himalaya using flow cytometry. *J Cell Plant Sci* 2011; 2: 19–23.
- Dymock W et al. *Pharmacographia India: A History of Principle Drugs of Vegetable Origin*. Dehradun: Bishan Singh Mahendra Pal Singh, 1976: 417–420.
- Chunekar KC. *Bhav Prakasa Nighantu (Hindi translation)*. Varanasi: Chaukahamba Bharati Publications, 1960.
- Sahu RB. Clinical trial of *Hedychium spicatum* in tropical pulmonary eosiniphilia. *J Nepal Pharmacist Assoc* 1979; 7: S65–S72.
- Jenny M et al. Apoptosis induced by the Tibetan herbal remedy PADMA 28 in the T cell-derived lymphocytic leukaemia cell line CEM-C7H2. *J Carcinogen* 2005; 4: 15–23.
- Arora RK, Pandey A. *Wild edible Plants of India: Diversity Conservation and Uses*. New Delhi, India: National Bureau of Plant Genetic Resources, 1996.
- Bhatt VP et al. *Hedychium spicatum* Buch.-Ham. – a high value skin glowing and curing medicinal herb needs future attention on its conservation. *Sci Nat* 2009; 7: 75–77.
- Savitharamma N et al. Ethnobotanical survey of plants to used to treat asthma in Andhra Pradesh, India. *J Ethnopharmacol* 2007; 113: 54–61.
- Gaur RD. *Flora of the district Garhwal North West Himalayas (with Ethnobotanical Notes)*. Srinagar, India: Transmedia Publication, 1999.
- Badoni A et al. Micropropagation of *Hedychium spicatum* Smith. using *in-vitro* shoot tips. *Stem. Cell* 2010; 1: 11–13.
- Kumari P et al. Diversity and status of ethno-medicinal plants of Almora district in Uttarakhand, India. *Int J Biodiv Conserv* 2011; 3: 298–326.
- Singh RS. *Vanausadhi Nidarshika (Ayurvedic Pharmacopeia)*. Lucknow,

- India: Uttar Pradesh Hindi Sansthan, 1983.
35. Srimal RC *et al.* Anti-inflammatory and other pharmacological effects of *Hedychium spicatum*. *Indian J Pharmacol* 1984; 16: 143–147.
  36. Tandan SK *et al.* Analgesic and anti-inflammatory effect of *Hedychium spicatum*. *Indian J Pharma Sci* 1997; 59: 148–150.
  37. Sharma SC *et al.* Hedychenone: a furanoid diterpene from *Hedychium spicatum*. *Phytochemistry* 1975; 14: 1059–1062.
  38. Srinivas PV *et al.* A new, conventional method for quantitative analysis of hedychenone, an anti-inflammatory compound in the rhizome of *Hedychium spicatum* (Buch-Ham). *J Planer Chromat* 2007; 20: 73–74.
  39. Ghildiyal S *et al.* Pharmacological evaluation of extracts of *Hedychium spicatum* (Ham-ex-Smith) rhizome. *Ancient Sci Life* 2012; 31: 117–122.
  40. Chaturvedi GN, Sharma BD. Clinical studies on *Hedychium spicatum* (Shati): An antiasthmatic drug. *J Res Indian Med* 1975; 10: 6–8.
  41. Prasanna H *et al.* Screening of *Hedychium spicatum* for hepatoprotective activity in albino rats. *Indian Drugs* 2002; 39: 117–119.
  42. Joshi UP, Mishra SH. *In-vitro* hepatoprotective activity of isolated diterpene from *Hedychium spicatum*. *Pharmacologyonline* 2011; 1: 990–997.
  43. Bumrela S, Naik SR. Hepatoprotective activity of hydroalcoholic extract of *Hedychium spicatum* Smith in experimental rat models. *Asian Pacific J Trop Biomed* 2012; 1: 1–7.
  44. Reddy RP *et al.* Two new cytotoxic diterpenes from the rhizomes of *Hedychium spicatum*. *Bioorgan Med Chem Lett* 2009; 19: 192–195.
  45. Reddy RP *et al.* Phytochemical investigation of labdane diterpenes from the rhizomes of *Hedychium spicatum* and their cytotoxic activity. *Bioorgan Med Chem Lett* 2009; 19: 6078–6081.
  46. Mishra T *et al.* Composition and *in-vitro* cytotoxic activities of essential oil of *Hedychium spicatum* from different geographical regions of western Himalaya by principal components analysis. *J Nat Prod Res* 2016; 30: 1224–1227.
  47. Reddy RP *et al.* New labdane diterpenes as intestinal  $\alpha$ -glucosidase inhibitor from antihyperglycemic extract of *Hedychium spicatum* (Ham. Ex Smith) rhizomes. *Bioorgan Med Chem Lett* 2009; 19: 2562–2565.
  48. Shete RV *et al.* *Hedychium spicatum*: evaluation of its nootropic effect in mice. *Res J Pharmacog Phytochem* 2010; 2: 403–406.
  49. Rao GV *et al.* Chemical examination and hair growth studies on the rhizomes of *Hedychium spicatum* Buch.-Ham. *Pharmacog Commun* 2011; 1: 90–93.
  50. Dixit VK, Varma KC. Effect of essential oil of rhizome of *Hedychium coronarium* and *Hedychium spicatum* on central nervous system. *Indian J Pharmacol* 1979; 11: 147–149.
  51. Joshi S *et al.* Terpenoid compositions, and antioxidant and antimicrobial properties of the rhizome essential oil of different *Hedychium* species. *Chem Biodiver* 2008; 5: 299–309.
  52. Koundal R *et al.* Temporal and spatial variation in quality of essential oil of *Hedychium spicatum* and evaluation of its antioxidant activity. *J Essen Oil Res* 2015; 27: 217–224.
  53. Sravani T *et al.* Isolation of phytoconstituents from the rhizomes of *Hedychium spicatum* Buch. Ham. *J Pharma Res* 2012; 5: 526–527.
  54. Singh AP *et al.* Antioxidant property of the methanol extracts of the leaves and rhizomes of *Hedychium spicatum* (Buch-Ham. Ex Smith). *Asian J Chem* 2012; 24: 197–199.
  55. Sravani T, Paarakh PM. Antioxidant activity of *Hedychium spicatum* Buch. Ham. Rhizomes. *Indian J Nat Resour* 2012; 3: 354–3658.
  56. Bhatt ID *et al.* Evaluation of antioxidant phytochemical diversity in *Hedychium spicatum*: a high value medicinal plant of Himalaya. *Pharmacog Mag* 2008; 4: S202–S205.
  57. Lohani N, Tewari G, Joshi GC, Tewari LM, Chandra J, Kishor K. Comparative phytochemical analysis of wild and cultivated rhizomes of *Hedychium spicatum* Buch. Ham. of north west Himalaya. *J. Indian Chem. Soc.* 2015; 92: 105–109.
  58. Sharma GP *et al.* Antimicrobial activity of essential oil from *Hedychium spicatum*. *Indian J Microbiol* 1980; 20: 60–62.
  59. Prakash J *et al.* Screening of some traditionally used medicinal plants for potential antimicrobial activity. *Indian J Pharma Sci* 2006; 68: 832–834.
  60. Prakash O *et al.* Chemical composition and antibacterial activity of rhizome oils from *Hedychium coronarium* Koenig and *Hedychium spicatum* Buch-Ham. *J Essen Oil Bearing Plants* 2010; 13: 250–259.
  61. Rawat S *et al.* Anti-oxidant and antimicrobial properties of some ethno-therapeutically important medicinal plants of Indian Himalayan Region (IHR). *3 Biotech* 2016; 6: 154.
  62. Parekh J, Chanda S. Antibacterial and phytochemical studies on twelve species of Indian medicinal plants. *Afri J Biomed Res* 2007; 10: 175–181.
  63. Bisht GS *et al.* Antimicrobial activity of *Hedychium spicatum*. *Fitoterapia* 2006; 77(3): 240–242.
  64. Aqil F, Ahmad I. Broad-spectrum antibacterial and antifungal properties of certain traditionally used Indian medicinal plants. *World J Microbiol Biotechnol* 2003; 19: 653–657.
  65. Samuel CO, Tripathi SC. Fungitoxic properties of essential oil of essential oil of *Hedychium spicatum*. *Indian Perfum* 1994; 38: 105–111.
  66. Rajasekaran K *et al.* Antifungal activities of *Hedychium* essential oils and plant extracts against mycotoxigenic fungi. *J Crop Improv* 2012; 26: 389–396.
  67. Dixit VK, Varma KC. Anthelmintic properties of essential oil from rhizome of *Hedychium spicatum* Koenig and *Hedychium coronarium* Koenig. *Indian J Pharm* 1975; 19: 58–60.
  68. Goswami S *et al.* An *in-vitro* evaluation of the anthelmintic activity of *Hedychium spicatum* rhizomes and *Zingiber zerumbet* rhizomes on the



- Pheritima Posthuma* model: a comparative study. *Pharmacog Res* 2011; 3: 140–142.
69. Sravani T et al. In silico and in-vitro anthelmintic activity of  $\beta$ -sitosterol isolated from rhizomes of *Hedychium spicatum* Buch.-Ham. *Indian J Nat Prod Resour* 2014; 5: 258–261.
  70. Jadhav V et al. In-vitro pediculicidal activity of *Hedychium spicatum*. *Fitoterapia* 2007; 78: 470–473.
  71. Negi KS et al. Spiked zinger lily (*Hedychium spicatum*): identification of superior genotypes from Indian Himalayan Region. *Indian Forest* 2014; 140: 363–367.
  72. Garg SN et al. Essential oil of *Hedychium spicatum* var. *acuminatum*. *Indian Perfum* 1977; 21: 79–82.
  73. Dixit VK et al. Studies on essential oils of rhizomes of *Hedychium spicatum* Koenig. and *Hedychium coronarium* Koenig. *Indian J Pharm* 1977; 39: 58–60.
  74. Nigam MC et al. Gas chromatographic examination of the essential oil of rhizomes of *Hedychium spicatum*. *Perfum Kosmet* 1979; 60: 245–246.
  75. Bottini AT et al. Sesquiterpene alcohols from *Hedychium spicatum* var. *acuminatum*. *J Nat Prod* 1987; 50: 732–734.
  76. Sabulal B et al. Chemical composition and antimicrobial activities of the essential oils from the rhizomes of four *Hedychium* species from south India. *J Essen Oil Res* 2007; 19: 93–97.
  77. Verma RS, Padalia RC. Comparative essential oil composition of different vegetative parts of *Hedychium spicatum* Smith. from Uttarakhand, India. *Int J Green Pharm* 2010; 4: 292–295.
  78. Raina AP, Negi KS. Essential oil composition of *Hedychium spicatum* Buch.-Ham. ex Smith. from Uttarakhand, India. *J Essen Oil Bearing Plants* 2015; 18: 382–388.
  79. Semwal RB et al. Chemical composition and antibacterial potential of essential oils from *Artemisia capillaris*, *Artemisia nilagirica*, *Citrus limon*, *Cymbopogon flexuosus*, *Hedychium spicatum* and *Ocimum tenuiflorum*. *Nat Prod J* 2015; 5: 199–205.
  80. Dan M et al. Studies on the rhizome oils from four *Hedychium* species of south India: a chemotaxonomic approach. *Gardens' Bull Singapore* 2007; 59: 57–64.
  81. Arora R, Jain S. Quantification of p-methoxy cinnamic acid ethyl ester (PMCAEE) from *Hedychium spicatum* by HPTLC. *Int J Pharma Biosci* 2010; 1: 1–4.
  82. Sharma SC et al. 7-Hydroxy-hedychenone, a furano-diterpene from *Hedychium spicatum*. *Phytochemistry* 1976; 15: 827.
  83. Sharma CS et al. Alkaloids and terpenoids of *Anictrocadus heyneanus sagettaria sagitifolia*, *Lyonia Formosa* and *Hedychium spicatum* var. *acuminatum*. *Phytochemistry* 1975; 15: 578–579.
  84. Suresh G et al. Cytotoxic sesquiterpenes from *Hedychium spicatum*: isolation, structure elucidation and structure-activity relationship studies. *Fitoterapia* 2013; 86: 100–107.
  85. Rawat S et al. Effect of developmental stages on total phenolic composition and anti-oxidant activities in *Hedychium spicatum* Buch. Ham. ex D. Don (Van haldi). *J Horti Sci Biotechnol* 2014; 89: 557–563.
  86. Rawat S et al. Effects of genetic diversity and population structure on phenolic compounds accumulation in *Hedychium spicatum*. *Ecol Genet Genom* 2017; 3–5: 25–33.
  87. Reddy RP et al. Synthesis, cytotoxic activity and structural activity relationship of hedychenone analogues. *Bioogan Med Chem Lett* 2010; 20: 2525–2528.
  88. Sravani T, Paarakh PM. Evaluation of anthelmintic activity of rhizome of *Hedychium spicatum* Buch. Ham. *Int J Res Pharma Sci* 2011; 2: 66–68.
  89. Bisht AS et al. Propagation and growth performance of *Hedychium spicatum* Smith. under different hormonal and soil treatments. *Indian Forest* 2009; 135: 60–67.
  90. Bisht VK et al. Effect of pre-sowing treatments on seed germination behavior of *Hedychium spicatum* Buch.-Ham ex Smith. *Proc Natl Acad Sci India-B Biol Sci* 2015; 57: 53–58.
  91. Rana JC et al. Cultivation of *Hedychium spicatum* (Kapoor Kachari), *Valeriana wallichii* and *Roscoeia purpurea* in hill regions of India. *Indian Forest* 2004; 130: 1008–1018.
  92. Lohani N et al. Ex-situ conservation of *Hedychium spicatum* Buch.-Ham. using different type of nursery beds. *Afri J Agri Res* 2013; 8: 3580–3589.
  93. Singh MS et al. Growth and yield of ginger lily (*Hedychium spicatum* Buch) as influenced by spacing. *J Crop Weed* 2015; 11: 88–91.
  94. Bisht AS et al. Effect of light vs. dark on seed germination of *Hedychium spicatum* Smith. *Int J Med Plants Nat Prod* 2015; 1: 29–30.
  95. Giri D, Tamta S. Effect of pre-sowing treatment on seed germination in *Hedychium spicatum*: an important vulnerable medicinal plant of Indian Himalayan Region. *Scientific Res Essays* 2012; 7: 1835–1839.
  96. Bisht VK et al. Effect of pre-sowing treatments on seed germination behavior of *Hedychium spicatum* Buch.-Ham ex Smith. *Proc Natl Acad Sci India-B Biol Sci* 2017; 87: 53–58.
  97. Bisht AS et al. Effect of different organic manures on the seed germination and growth performance of *Hedychium spicatum* Buch-Ham ex-Smith. *Med Plants Int J Phytomed Relat Ind* 2017; 9: 48–54.
  98. Gopichand RL et al. Effect of growth hormones on seed germination and plant growth: with chemical components of *Hedychium spicatum* Ham. ex. Smith. *Ornam Med Plants* 2017; 1: 1–14.
  99. Koul S et al. Conservation and propagation of high altitude medicinal plant *Hedychium spicatum*. *J Plant Biochem Biotechnol* 2005; 14: 57–59.
  100. Giri D, Tamta S. Induction of somatic embryogenesis in vulnerable medicinal plant *Hedychium spicatum* Buch-Ham. ex Smith. *Plant Tissue Cult Biotechnol* 2013; 23: 147–155.
  101. Giri D, Tamta S. Effect of plant growth regulators (PGRs) on micro-propagation of a vulnerable and high value medicinal plant *Hedychium spicatum*. *Afri J Biotechnol* 2011; 10: 4040–4045.

102. IHBT (Institute of Himalayan Biore-source Technology). IHBT releases cultivars of medicinal crops. (<http://www.ihbt.res.in/cultivrs.htm>); 2007.
103. HRDI (Herbal Research Development Institute) (<http://hrdiuk.org>). Annual report 2011.
104. Sajwan BS, Kala CP. Conservation of medicinal plants: conventional and contemporary strategies, regulations and executions. *Indian Forest* 2007; 133: 484–495.
105. Rawat A. Prices of medicinal plants parts of different markets. Market Information on Medicinal plants. Forest Research Institute, Dehradun, ([www.uttarakhand.com/herbalstate/index.htm](http://www.uttarakhand.com/herbalstate/index.htm)); 2007.
106. Sharma A et al. Herbal medicine for market potential in India: an overview. *Acad J Plant Sci* 2009; 1: 26–36.
107. Thakur RK et al. *Major Medicinal Plants of India*. Lucknow, India: Centre for Aromatic and Medicinal Plants, 1989: 50–52.
108. Samant SS et al. *Medicinal Plants of Indian Himalaya: Diversity Distribution Potential Values*. Nainital: Gyanodaya Prakashan, 1998.
109. Fukusak E, Kobayashi A. Plant metabolomics: potential for practical applications. *J Biosci Bioengineer* 2005; 100: 347–354.
110. Cirak C et al. Variation of bioactive secondary metabolites in *Hypericum origanifolium* during its phenological cycle. *Acta Physiol Plant* 2007; 29: 197–203.
111. Bhatt ID et al. Characterization of essential oil composition, phenolic content and antioxidant properties in wild and planted individuals of *Valeriana jatamansi* Jones. *Sci Hort* 2012; 136: 61–68.
112. Rawat S et al. Essential oil composition and antioxidant activity in *Valeriana jatamansi* Jones: influence of seasons and growing sources. *J Essen Oil Res* 2017; 27: 101–107.
113. Canter PH et al. Bringing medicinal plants in cultivation: opportunities and challenges for biotechnology. *Trends Biotechnol* 2005; 23: 181–185.
114. Badhani A et al. Variation in chemical constituents and antioxidant activity in Yellow Himalayan (*Rubus ellipticus* Smith) and hill raspberry (*Rubus niveus* Thunb.). *J Food Biochem* 2015; 39: 663–672.
115. Jugran A et al. Allozyme variation in natural populations of *Hedychium spicatum*. *Biochem Genet* 2011; 49: 806–818.
116. Chaudhary AA et al. Analysis of genetic diversity in *Hedychium spicatum* Buch. Ham. ex. D. Don in West Himalaya, India. *J Med Plant Res* 2012; 6: 3984–3991.
117. Al-Gabbiesh A et al. Influencing the contents of secondary metabolites in spice and medicinal plants by deliberately applying drought stress during their cultivation. *Jordan J Biol Sci* 2015; 8: 1–10.
